1 Testing microbial biomineralization from asteroidal material onboard the International Space  
2 Station

3 **Authors**

4 Rosa Santomartino<sup>1\*</sup>, Giovanni Rodriguez Blanco<sup>2#</sup>, Alfred Gudgeon<sup>1</sup>, Jason Hafner<sup>3</sup>,  
5 Alessandro Stirpe<sup>4</sup>, Martin Waterfall<sup>4</sup>, Nicola Cayzer<sup>5</sup>, Laetitia Pichevin<sup>5</sup>, Gus Calder<sup>5</sup>, Kyra R.  
6 Birkenfeld<sup>3</sup>, Annemiek C. Waajen<sup>1</sup>, Scott McLaughlin<sup>1</sup>, Alessandro Mariani<sup>6</sup>, Michele  
7 Balsamo<sup>6</sup>, Gianluca Neri<sup>6</sup>, Lorna J. Eades<sup>7</sup>, Charles S. Cockell<sup>1</sup>

8 **Affiliations**

9 <sup>1</sup>UK Centre for Astrobiology, School of Physics and Astronomy, University of Edinburgh,  
10 Edinburgh, EH9 3JZ, UK

11 <sup>2</sup>Cancer Research UK Edinburgh Centre, Institute of Genetics and Cancer, University of  
12 Edinburgh, Edinburgh, UK

13 <sup>3</sup>Department of Physics & Astronomy, Rice University, Houston, TX, USA

14 <sup>4</sup>School of Biological Sciences, University of Edinburgh, Edinburgh, UK

15 <sup>5</sup>School of Geosciences, University of Edinburgh, Edinburgh, UK

16 <sup>6</sup>Kayser Italia S.r.l., Via di Popogna, 501, 57128 Livorno, Italy

17 <sup>7</sup>School of Chemistry, University of Edinburgh, Edinburgh, UK

18 <sup>#</sup> Current affiliation: Clinical Institute for Medical and Chemical Laboratory Diagnosis,

19 Medical University of Graz, Graz, Austria

20 \*Corresponding author: [rosa.santomartino@ed.ac.uk](mailto:rosa.santomartino@ed.ac.uk), +44 (0)1316508608

21 **List of nonstandard abbreviations**

|                 |                                                                      |
|-----------------|----------------------------------------------------------------------|
| ISS             | International Space Station, under microgravity condition            |
| Earth           | Ground controls, under terrestrial gravity condition                 |
| μg              | Microgravity                                                         |
| PGEs            | Platinum group elements                                              |
| REEs            | Rare earth elements                                                  |
| ISRU            | <i>In situ</i> resource utilisation                                  |
| BMR             | BioMining Reactor                                                    |
| EC              | Experiment Container                                                 |
| EU              | Experiment Unit                                                      |
| % <sub>NB</sub> | Element amount as percentage of sample / non-biological sample       |
| % <sub>M</sub>  | Element amount as percentage of sample / total in the meteorite rock |

22

23 **Key words**

24 Space biomineralization, ISRU, *Penicillium*, *Sphingomonas*, Consortium, PGEs, platinum group  
25 elements, microgravity, international space station

26 **Abstract**

27 Expanding human space exploration beyond Earth's orbit necessitates efficient technologies for  
28 self-sustainable acquisition of local resources to overcome unviable resupply missions from Earth.  
29 Potential source of materials are asteroids, some of which contain valuable metals, such as  
30 platinum group elements.

31 The BioAsteroid experiment, performed onboard the International Space Station, tested the use of  
32 microorganisms (bacteria and fungi) to carry out mining of useful elements from asteroidal  
33 material (L-chondrite) under microgravity, in support of a long-term human presence in space. The  
34 fungus *Penicillium simplicissimum*, enhanced the mean release of palladium, platinum and other  
35 elements from the meteorite material in microgravity, compared to non-biological leaching.  
36 However, there was large variability in the results. For many elements, non-biological leaching  
37 under microgravity was enhanced compared to terrestrial gravity, while bioleaching was  
38 unaffected. Metabolomics results revealed clear patterns that highlight the influence of space  
39 conditions on the microbial metabolism, particularly for *P. simplicissimum*. We identified the  
40 presence of carboxylic acids, and molecules of potential biomining and pharmaceutical interest,  
41 enhanced in microgravity.

42 These results show a non-trivial effect of microgravity on bioleaching, highlighting the  
43 requirement of an optimal combination of microorganism(s), rock substrate, and conditions for  
44 successful biomining, both in space and Earth.

## 45 **1. Introduction**

46 To establish a long-term human presence in space, it will be necessary to extract resources from  
47 the local environment. This approach to space settlement, called *in situ* resource utilisation (ISRU),  
48 aims to reduce the mass and volume of resources that must be launched from Earth, and enable  
49 sustainable manufacturing of materials and products without the need for a mass and energy  
50 intensive constant resupply from Earth <sup>1-5</sup>.

51 Asteroids, such as those in the asteroid belt and near-Earth asteroids <sup>2,6</sup>, can be a potential source  
52 of elements and volatiles useful for future human space settlements, such as water, hydrogen,  
53 carbon compounds, metallic and non-metallic elements <sup>7-9</sup>. Some asteroids are also known to  
54 contain high concentrations of precious metals including platinum-group elements (PGEs) <sup>8,10,11</sup>.  
55 These, such as palladium and platinum, are used in high technology industries, and are of special  
56 interest because of their high melting points, corrosion resistance, and catalytic qualities <sup>12</sup>.  
57 Although the economics of asteroid mining under the current technological development are yet  
58 to be determined <sup>13</sup>, these elements command a high price on Earth, and have great potential use  
59 to support high technology manufacturing in space <sup>6,14</sup>.

60 One possible way to extract elements from extraterrestrial materials is to use physico-chemical  
61 methods. However, in recent decades microorganisms have been recognised as an alternative and  
62 sustainable way to carry out, and efficiently catalyse, chemical transformations <sup>2,6,15</sup>. For instance,  
63 it has been suggested that microorganisms could be used as the basis of a ‘bio-manufacture’ on  
64 Mars <sup>16,17</sup>. Indeed, microorganisms are already employed in a wide range of manufacturing  
65 processes on Earth such as in the food, drugs, and chemical feedstock industries, and for further

66 processing such as in plastics production. Similar versatilities could be applied in space <sup>18</sup>,  
67 unlocking sustainable approaches for human space exploration <sup>4</sup>.

68 One important process carried out by microorganisms is biomining, a technology where organisms  
69 are used to catalyse the breakdown of rocks and the release of useful elements, accelerating the  
70 acquisition of the required elements, exploiting mine waste tailings, and avoiding the use of  
71 environmentally damaging toxic compounds such as cyanides <sup>19</sup>. Biomining is a widely adopted  
72 process on Earth, for instance to extract copper and gold <sup>20-23</sup>. Well studied acidophilic iron and  
73 sulphur-oxidisers are often used to bioleach sulfidic ores<sup>21,24,25</sup>, but heterotrophic microorganisms,  
74 including bacteria and fungi<sup>26-28</sup>, are effective in bioleaching in environments with circumneutral  
75 pH. Their bioleaching capacity is enabled by the release of protons or organic acids (e.g.citric,  
76 oxalic,glucuronic acids, etc), thereby decreasing the pH in the system, or by the release of  
77 complexing compounds <sup>29</sup>.

78 Biomining is a promising technology to extract useful elements and compounds from local  
79 materials in space <sup>2,6,30</sup>. For example, the bacterium *Sphingomonas desiccabilis* was recently used  
80 to catalyse the extraction of rare earth elements and vanadium from basalt rock under microgravity  
81 and Martian gravity on the International Space Station (ISS) <sup>31,32</sup>. Previously, bacterial leaching of  
82 copper has been demonstrated in microgravity <sup>33</sup>, as well as bioleaching of elements from lunar  
83 and Martian simulants on Earth <sup>34,35</sup>. Aside from mining, microbial interactions with regolith (loose  
84 material covering solid rocks on a planetary body surface) will be the first stage of breaking down  
85 rocks to make soils or to release nutrients in life support systems that employ regolith as a  
86 feedstock <sup>4</sup>. Extraterrestrial materials, such as carbonaceous chondrite, have been shown to support  
87 the growth of microorganisms<sup>36-38</sup>.

88 In this study (BioAsteroid), we showed that heterotrophic microorganisms (the bacterium *S.*  
89 *desiccabilis*<sup>31,32,39,40</sup> and the fungus *Penicillium simplicissimum*<sup>23,41–43</sup>) can be used to catalyse the  
90 release of technologically and economically important elements from L-chondrite material, a  
91 common type of meteorite<sup>8</sup>, under microgravity conditions onboard the International Space Station  
92 (ISS; Figure 1). Microbial consortia are often beneficial in terrestrial biomining<sup>22,44</sup>. For this  
93 reason, we augmented single-species samples with a consortium formed by the two  
94 microorganisms. We focused on bioleaching of three PGEs and other 41 elements of industrial  
95 interest, highlighting the effect of the organism compared to abiotic leaching, and the effect of  
96 microgravity compared to Earth conditions. A thorough metabolomic analysis allowed us to study  
97 the metabolic responses to microgravity during microbe-mineral interactions. These experiments  
98 demonstrate proof of principle for the use of microorganisms to transform asteroidal material for  
99 future human exploration and settlement of space in a self-sustainable fashion.

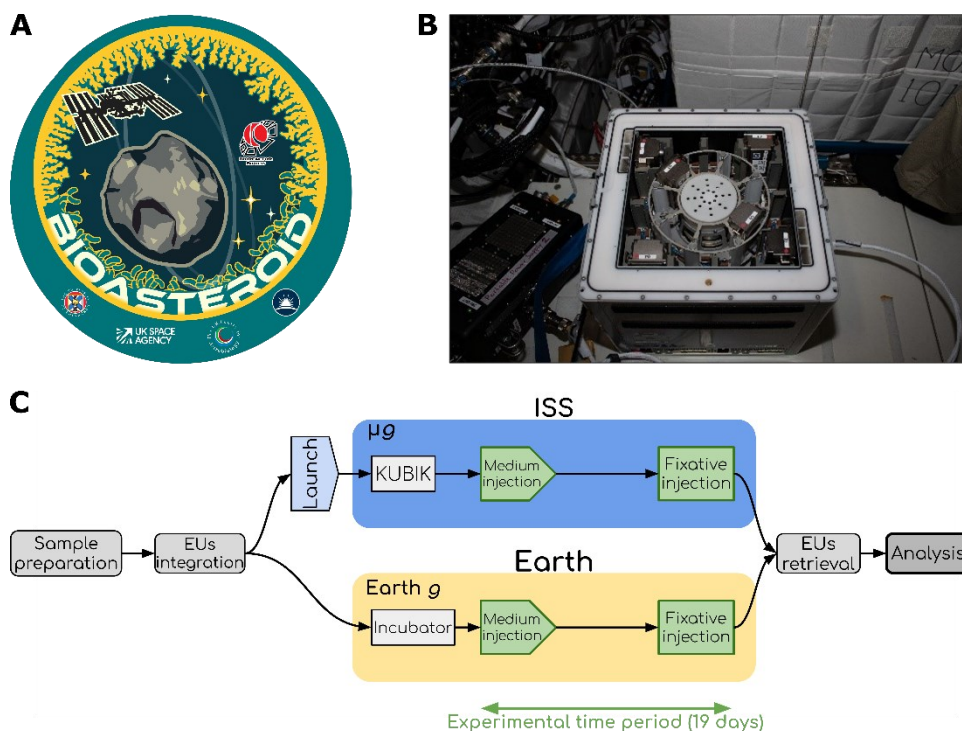

101 **Figure 1 The BioAsteroid experiment.** A) BioAsteroid logo, created by Sean McMahon (University of Edinburgh);  
102 B) The six hardware units inserted into the KUBIK onboard the ISS (credits ESA/NASA); C) Flow diagram of the  
103 experiment. After preparation, samples were integrated into the experimental units (EUs) together with the medium  
104 and the fixative. The EUs were either launched to the ISS (blue oval), where they were installed in KUBIK incubators  
105 and subjected to microgravity ( $\mu g$ ) or kept for incubation on Earth for the terrestrial gravity control (Earth  $g$ , yellow  
106 oval). Steps in green were part of the experimental time period (19 days). Storage passages were omitted for brevity.

## 107 **2. Results**

### 108 **2.1 Meteorite characterisation**

109 In order to identify the minerals and elements available for leaching, we thoroughly characterised  
110 the L-chondrite used in this experiment. Phase composition analysis was performed by X-ray  
111 Diffraction Spectroscopy (XRD), Raman spectroscopy, and backscatter electron microscopy  
112 (BSE) with energy dispersive spectrometry (EDS) elemental mapping. Inductively coupled plasma  
113 mass spectrometry (ICP-MS), and inductively coupled plasma optical emission spectroscopy  
114 (ICP-OES) were used to determine elemental availability to the microbial cells (Figure 2, Tables  
115 1-2, S1).

116 The XRD results of major (>5%) crystalline mineral types are shown in Table 1. The L-chondrite  
117 material used in the experiments shows a bulk composition typical for this meteoritic material <sup>8</sup>.  
118 The mineralogy is dominated by olivine (the magnesium-rich forsterite end member) and  
119 secondarily by pyroxene (magnesium-rich end member enstatite). Minor contributions are found  
120 from feldspar (anorthite), melilite (sometimes associated with calcium–aluminium-rich inclusions  
121 in chondritic meteorites) and iron sulphides (toilite). XRD does not reveal solid metal inclusions,  
122 but microscopy showed the presence of iron-nickel inclusions (Figure 2A-B). Raman spectra were  
123 recorded at an array of points across the surface to identify minerals and map their distribution.  
124 Forsterite and enstatite were detected, as expected, and were heterogeneously distributed through

125 the material (Figure 2C-G), showing that the microbial population is exposed to a heterogenous  
126 matrix of material. Sharp luminescence peaks were observed between 800 nm and 900 nm, and  
127 can be attributed to rare earth metal dopants in the mineral lattice (2G) <sup>45,46</sup>.

128

129

130

131

132



133 **Table 1** XRD analysis of pristine meteorite fragments, indicating percentage mineral composition (mean±st. error);  
 134 n=3.

| <b>Mineral</b>            | <b>%</b> | <b>Chemical formula</b>                                                                                                                      |
|---------------------------|----------|----------------------------------------------------------------------------------------------------------------------------------------------|
| <i>Forsterite ferroan</i> | 47.4±1.6 | (Mg <sub>0.82</sub> Fe <sub>0.18</sub> )(Mg <sub>0.092</sub> Fe <sub>0.098</sub> )(SiO <sub>4</sub> )                                        |
| <i>Enstatite, ordered</i> | 29.5±0.4 | MgSiO <sub>3</sub>                                                                                                                           |
| <i>Anorthite</i>          | 12.1±1.6 | Ca(Al <sub>2</sub> Si <sub>2</sub> O <sub>8</sub> )                                                                                          |
| <i>Melilite, syn</i>      | 5.7±0.5  | Ca <sub>8</sub> Al <sub>2</sub> Mg <sub>3</sub> Si <sub>7</sub> O <sub>28</sub> /8CaO•Al <sub>2</sub> O <sub>3</sub> •3MgO•7SiO <sub>2</sub> |
| <i>Troilite</i>           | 5.4±0.05 | FeS                                                                                                                                          |

135 **Table 2** ICP-MS and ICP-OES analysis of pristine meteorite fragments, indicating the concentration of various  
 136 elements (mean±st. error); n=3. Elements are listed in order of abundance in the meteorite. Elements in pale yellow  
 137 are PGEs.

| <b>ICP-MS</b>  |             | <b>ICP-OES</b> |                |
|----------------|-------------|----------------|----------------|
| <b>Element</b> | <b>µg/g</b> | <b>Element</b> | <b>mg/g</b>    |
| <b>Mo</b>      | 6.032±2.510 | <b>Mg</b>      | 159.399±18.262 |
| <b>Ce</b>      | 1.122±0.032 | <b>Fe</b>      | 84.502±8.279   |
| <b>Nd</b>      | 0.809±0.027 | <b>S</b>       | 28.555±2.956   |
| <b>Pb</b>      | 0.551±0.079 | <b>Mn</b>      | 25.440±2.561   |
| <b>La</b>      | 0.437±0.012 | <b>Ca</b>      | 13.897±1.389   |
| <b>Dy</b>      | 0.248±0.009 | <b>Na</b>      | 8.001±0.797    |
| <b>Gd</b>      | 0.196±0.006 | <b>Al</b>      | 7.786±2.838    |
| <b>Ir</b>      | 0.186±0.017 | <b>Ni</b>      | 5.746±0.312    |
| <b>Yb</b>      | 0.168±0.005 | <b>K</b>       | 1.457±0.091    |
| <b>Pr</b>      | 0.164±0.005 | <b>P</b>       | 1.113±0.130    |
| <b>Er</b>      | 0.161±0.005 | <b>Cr</b>      | 1.015±0.059    |
| <b>Sm</b>      | 0.145±0.005 | <b>Ti</b>      | 0.677±0.101    |
| <b>Hf</b>      | 0.112±0.005 | <b>Co</b>      | 0.152±0.023    |
| <b>Pt</b>      | 0.091±0.009 | <b>Zn</b>      | 0.079±0.006    |
| <b>Ho</b>      | 0.054±0.002 | <b>Cu</b>      | 0.063±0.004    |
| <b>Eu</b>      | 0.053±0.002 | <b>Sr</b>      | 0.018±0.002    |
| <b>Rh</b>      | 0.051±0.005 | <b>Cd</b>      | 0.015±0.001    |
| <b>Th</b>      | 0.049±0.001 | <b>Zr</b>      | 0.013±0.001    |
| <b>Tb</b>      | 0.037±0.001 | <b>Ba</b>      | 0.008±0.001    |
| <b>Ta</b>      | 0.032±0.001 | <b>Pb</b>      | 0.007±0.000    |
| <b>Lu</b>      | 0.025±0.001 | <b>Ag</b>      | 0.000±0.000    |
| <b>Tm</b>      | 0.025±0.001 |                |                |
| <b>U</b>       | 0.019±0.001 |                |                |
| <b>Os</b>      | 0.017±0.004 |                |                |
| <b>Hg</b>      | 0.004±0.001 |                |                |
| <b>Tl</b>      | 0.003±0.000 |                |                |
| <b>Pd</b>      | 0.002±0.000 |                |                |
| <b>Ru</b>      | 0.001±0.000 |                |                |

138 ICP-MS and ICP-OES (Table 2) showed that the most abundant element is magnesium  
 139 (159.399±18.262 mg/g), followed respectively by iron (84.502±8.279 mg/g), sulphur  
 140 (28.555±2.956 mg/g), manganese (25.440±2.561 mg/g), calcium (13.897±1.389 mg/g), sodium  
 141 (8.001±0.797 mg/g), and aluminium (7.786±2.838 mg/g). The elemental composition is consistent  
 142 with elements and mineral phases identified by BSE and XRD (Table 1, Figure 2B).

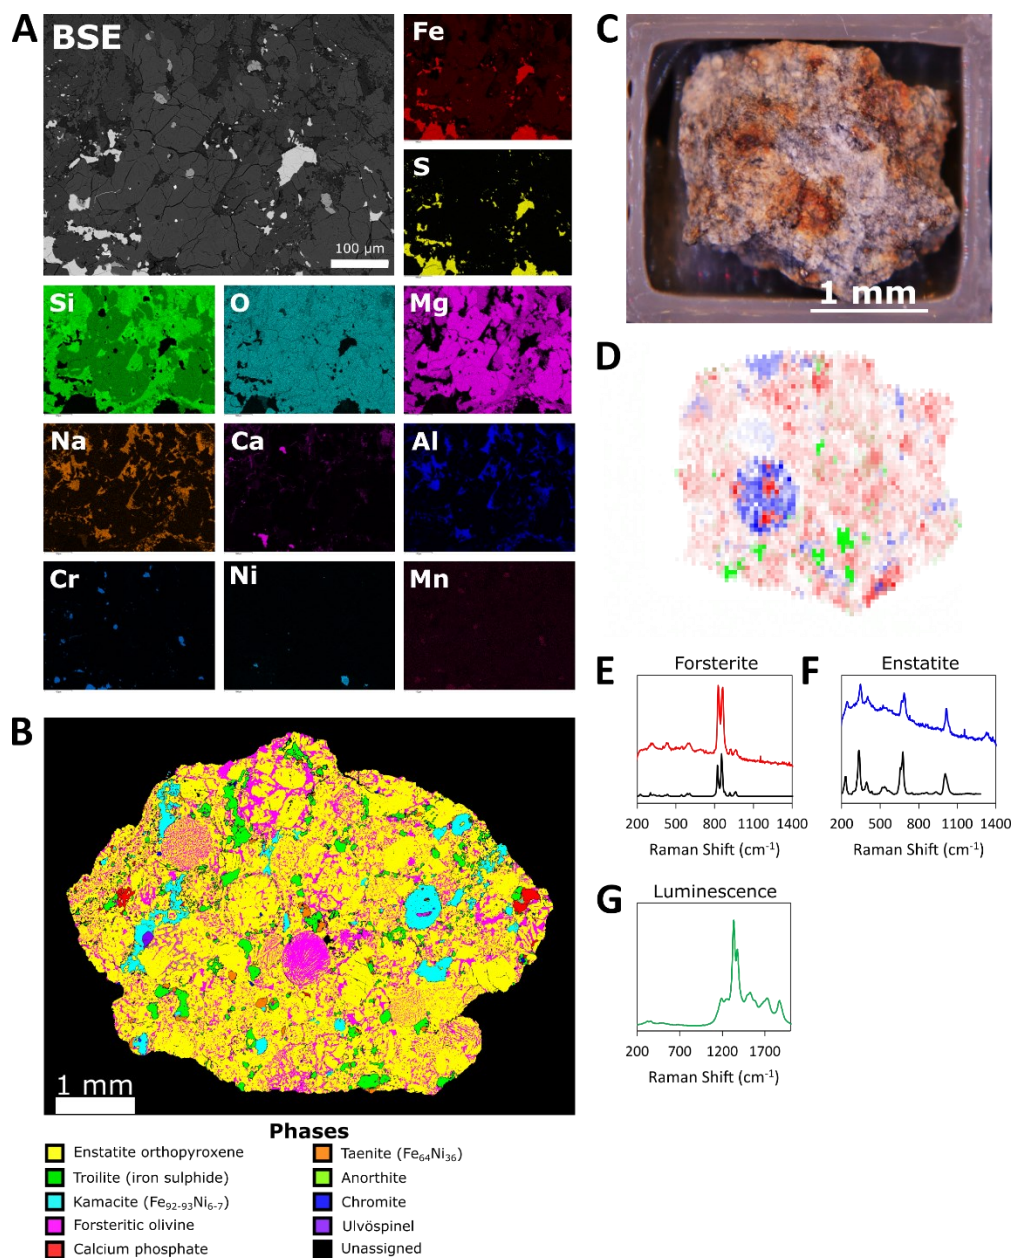

144 **Figure 2 Characterization of the L-chondrite meteorite.** A) Backscatter electron image (BSE) and single elemental  
145 mapping for some of the major elements present in a pristine representative fragment of the L-chondrite used in this  
146 experiment (scale bar: 100  $\mu\text{m}$ ); B) Phase analysis of a similar pristine fragment of the L-chondrite; C) photographic  
147 image of a pristine fragment analysed by Raman spectroscopy; D) composite Raman map with forsterite in red,  
148 enstatite in blue, and luminescence in green. Typical spectra are displayed for E) forsterite, F) enstatite, and G)  
149 luminescence signal. Reference spectra (black) are displayed for the minerals.

## 150 **2.2 Microbial final cell concentration and pH**

151 Final cell concentration was measured immediately after sample recovery, as an indication of  
152 microbial growth, by analysing the liquid fraction of each sample by spectrometric analysis  
153 (optical density,  $\lambda = 600 \text{ nm}$ ), flow cytometry and colony forming unit (CFU) assay.

154 Optical density data at  $\lambda=600 \text{ nm}$  (Figure 3A, S2) of the liquid fraction were obtained after  
155 spaceflight. All samples showed higher final cell concentration on Earth compared to space (ISS).  
156 Using a wavelength of 530 nm (S2), which is sometimes used for filamentous fungi<sup>47</sup>, we observed  
157 a similar trend.

158 Optical density at different wavelengths could potentially be sensitive to metabolic changes,  
159 therefore analysis of post-spaceflight final cell concentration was also obtained by flow cytometry  
160 (Figure 3B-C, S2). The flow cytometry results showed no gravity-driven difference between  
161 events measured with the bacterial dye for *S. desiccabilis* samples [(3.97 $\pm$ 0.06) $\times 10^9$  cell/mL on  
162 ISS, (3.27 $\pm$ 0.32) $\times 10^9$  cell/mL on Earth, respectively], and a slight increase (<10-fold) in  
163 Consortium samples (samples containing both the bacterium and the fungus) in Earth gravity  
164 compared to microgravity [(6.47 $\pm$ 1.98) $\times 10^8$  cell/mL on ISS against (3.64 $\pm$ 0.14) $\times 10^9$  cell/mL on  
165 Earth, respectively] (Figure 3B, S2). Differences in the fungi-associated events were present, when  
166 comparing *P. simplicissimum* in different gravities, with Earth samples showing concentrations

167 one order of magnitude higher than the ISS [(3.50±1.99)x10<sup>6</sup> cell/mL on ISS against  
 168 (6.37±2.11)x10<sup>7</sup> cell/mL on Earth, respectively]. Similarly, Consortium samples showed a slight  
 169 increase (<10-fold) in final cell concentration on Earth samples compared to ISS [(1.43±0.34)x10<sup>6</sup>  
 170 cell/mL on ISS against (7.69±1.33)x10<sup>6</sup> cell/mL on Earth, respectively]. The presence of positive  
 171 events in the sterile diluent and non-biological controls (S2), potentially caused by small non-  
 172 biological particulate matter, were in the worst case one order of magnitude smaller than the  
 173 biological samples (<10%) and are thus considered negligible.

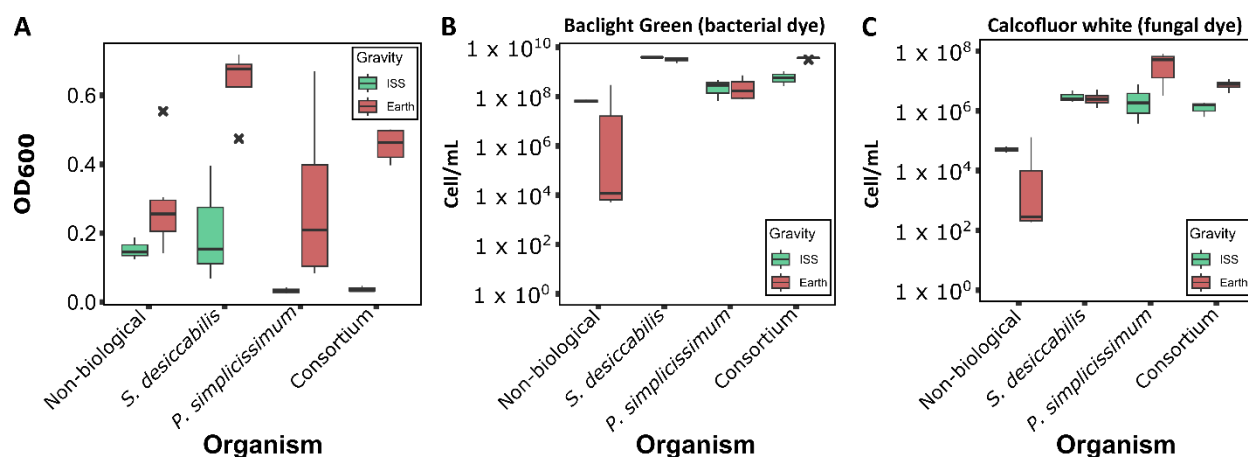

174 **Organism**

175 **Figure 3 Final cell concentration in the liquid fraction of the BioAsteroid experiment.** Optical density ( $\lambda = 600\text{nm}$ ,  
 176 A) and flow cytometry analysis measured (B-C) from the liquid fraction of the ISS and Earth samples. For flow  
 177 cytometry, values represent the average events counted in 100  $\mu\text{L}$  of sample stained with B) Baclight Green (specific  
 178 for bacterial cells) and C) Calcofluor White (specific for the fungal cells). Black X represent outliers;  $n=3$  for ISS  
 179 samples,  $4 \leq n \leq 6$  for Earth samples.

180 Additionally, CFU assay was performed to identify potential contaminations not identifiable by  
 181 the previous two methods (S3). CFU analysis of *S. desiccabilis* showed reduced colony numbers  
 182 in ISS compared to Earth samples, in both bacterial-only [(7.17 ± 2.88)x10<sup>6</sup> CFU/mL on ISS,  
 183 (1.75±1.24)x10<sup>11</sup> CFU/mL on Earth], and Consortium samples [(4.39±2.38)x10<sup>6</sup> CFU/mL on ISS  
 184 against (2.38±2.05)x10<sup>10</sup> CFU/mL on Earth]. This is in contrast with the flow cytometry results

185 for *S. desiccabilis*, but not for the other samples. In contrast, fungal CFU analysis of *P.*  
186 *simplicissimum* and Consortium showed concentrations two orders of magnitude higher on the ISS  
187 compared to Earth [*P. simplicissimum*:  $(1.37 \pm 1.01) \times 10^4$  CFU/mL on ISS,  $(4.58 \pm 3.08) \times 10^2$   
188 CFU/mL on Earth; Consortium:  $(8.89 \pm 6.59) \times 10^3$  CFU/mL on ISS,  $(8.33 \pm 4.17) \times 10^1$  CFU/mL on  
189 Earth]. This is in contrast with both the OD<sub>600</sub> and the flow cytometry measurements (Figure 3,  
190 S2). The discrepancies observed might be explained by the fact that CFU assay measures actively  
191 dividing cells, potentially reflecting different survival rates on Earth and ISS populations.

192 We observed contaminations in some of our CFU assays from endogenous (*S. desiccabilis*) and  
193 exogenous (Contaminant 1 and 2, S3) species. 16S rDNA sequencing of the contaminated ISS  
194 samples could not identify any species, suggesting the contamination was not present in the  
195 original samples, as corroborated by flow cytometry (Figure 3B). 16S rDNA sequencing of the  
196 contaminated Earth samples identified a species of the *Sphingomonas* genus for one of the two  
197 bacterial samples affected, and for two of the three Consortium samples affected. Identification  
198 failed for the remaining affected samples (see materials and methods for details). Taken together,  
199 this suggests original bacterial and Consortium Earth samples were not contaminated, or that any  
200 contamination was dominated by *S. desiccabilis*, in accordance with the CFU assay (S3). For the  
201 fungal Earth samples, alignment for three of the four affected sample sequences suggested a  
202 contamination from the order Bacillales, probably from the genera *Bacillus* and/or *Planococcus*.  
203 Identification failed for the fourth sample. Sequences of the isolated species (Contaminant 1 and  
204 2) aligned with the genera *Bacillus* and *Paenibacillus*, suggesting these as the most probable  
205 genera for the contaminants. The presence of the contaminations was considered when interpreting  
206 the results. Spare samples prepared for the Earth control experiment did not show Contaminant 1

207 or 2 colonies formation (data not shown), suggesting the contamination did not occur during  
208 sample preparation but probably during sample post-flight processing or hardware integration.

209 The pH is one of the potential influencing factors in leaching. We measured the pH of the liquid  
210 fractions after spaceflight (S4), reporting values between 7.21 and 7.43 among all samples. It must  
211 be noted that the values were likely affected by the presence of the fixative (RNAlater,  
212 pH=4.87±0.01), which was necessary to halt the experiment at its end, and prevented us from  
213 deriving conclusions on the changing pH during the experiment.

### 214 2.3 Microbe-mineral interaction

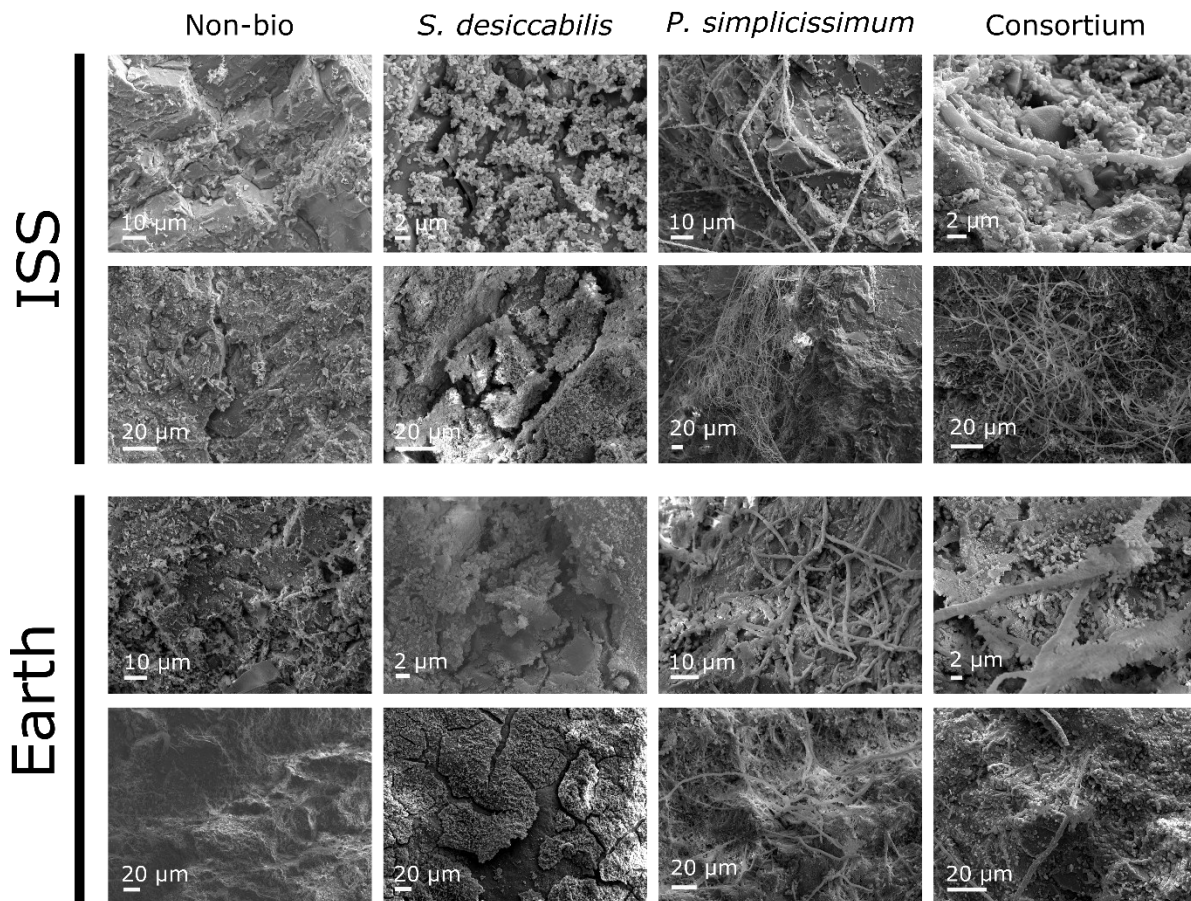

215

216 **Figure 4 Scanning electron microscopy (SEM) images of the L-chondrite fragments.** Secondary electron SEM  
217 images are shown here and are representative of samples in the two gravity conditions. Images were acquired at

218 varying magnifications to allow the visualisation of the features of interest. Scale bars are indicated in each figure,  
219 ranging between 2-20  $\mu\text{m}$ .

220 To investigate if microgravity had an effect on the interaction of the microorganisms with the L-  
221 chondrite, and reveal if local mineral composition could influence it, microbe-mineral interaction  
222 was investigated using Scanning Electron Microscopy (SEM) secondary electron imaging (Figure  
223 4) and EDS (S5-7) analysis to qualitatively assess the potential microbial preference for a  
224 particular mineral.

225 The images demonstrate that the interaction of both the bacterium and the fungus with the  
226 meteorite material occurred under microgravity as well as terrestrial gravity. *S. desiccabilis* formed  
227 a contiguous biofilm in many areas of the rock's surface in both the ISS and the Earth samples.  
228 Qualitatively, no gravity-dependent pattern for biofilm formation or cellular morphology was  
229 detected. *P. simplicissimum* successfully formed mycelia on the meteoritic rock fragments in both  
230 gravity conditions (Figure 4), with no evident qualitative morphological change. Similar results  
231 were observed for the Consortium samples, with the bacterium and the fungus interacting in a  
232 similar fashion in both gravity conditions and forming a mixed filamentous (*P. simplicissimum*)  
233 and rod-shaped cell (*S. desiccabilis*) biofilm on the rock surface. In all the biological samples, EDS  
234 spectra showed a tendency of both the bacterium (S5) and the fungus (S6), included in the  
235 Consortium (S7), to interact with minerals bearing principally magnesium, oxygen, silicon  
236 (silicates), and less frequently with iron, copper, sulphur, chromium, manganese and other metals,  
237 in both gravity conditions (S5-7). This is in accordance with the rock composition described above  
238 (Table1-2, Figure 2).

## 239 **2.4 Microbial bioleaching of PGEs onboard the ISS**

240 Measurement of the concentration of 44 elements in the liquid fraction was assessed by ICP-MS,  
241 as a measure of elemental dissolution from the meteorite rock (S8, Supplementary Excel file).  
242 Statistical analysis of the raw concentrations (ICP-MS data) by ANOVA revealed a p-value  $\leq 0.05$   
243 for at least one of the two variables in analysis (*Gravity, Organism*), or their interaction, and then  
244 for biologically-relevant Tukey post hoc comparisons, for 22 elements out of these 44 (S9). Among  
245 these, PGEs captured our interest, and we focused our analysis on the three PGEs ruthenium (Ru),  
246 palladium (Pd) and platinum (Pt) (Figure 5, S10-11).



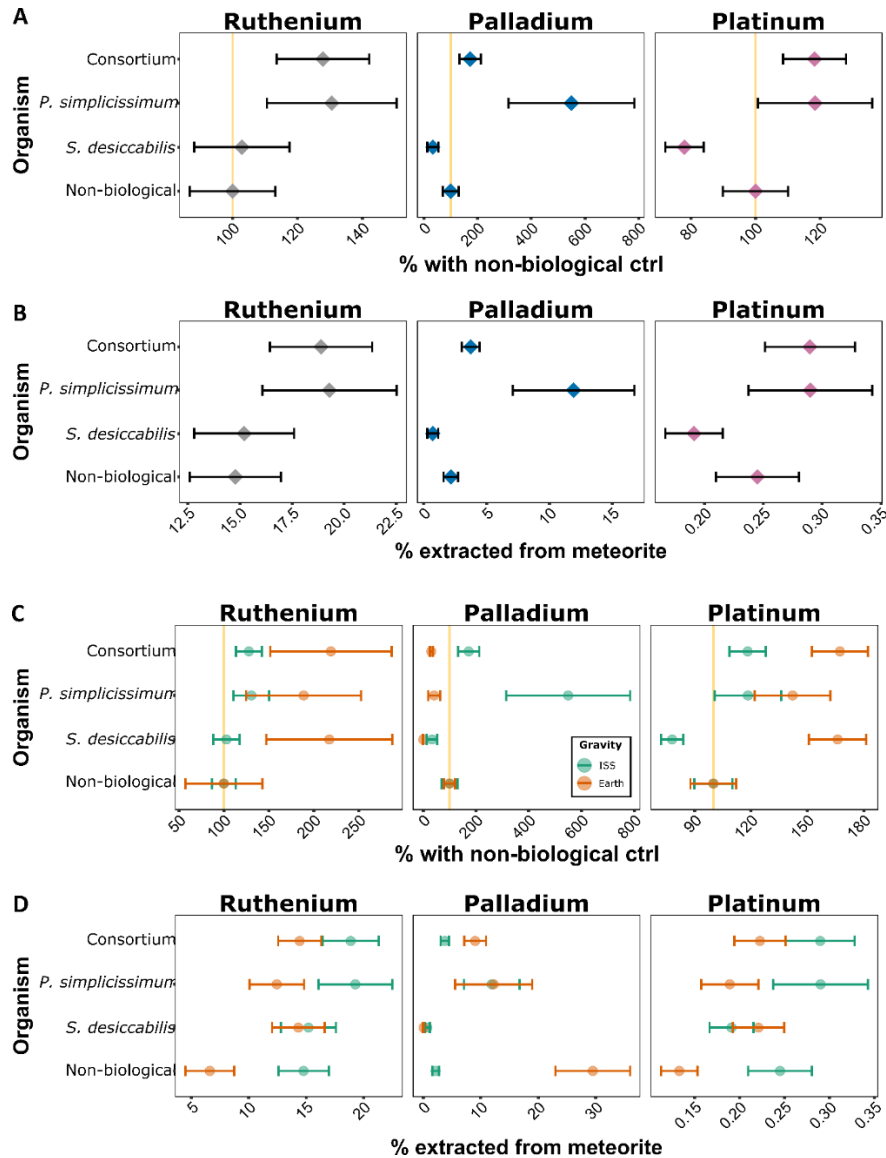

247

248 **Figure 5 Platinum group element (PGEs) biomineralization.** In panels A and B, data for the ISS experiment are shown. For  
 249 each element, data are reported as: A) percentage differences with the non-biological control ( $\%_{NB}$ ); B) percentage of  
 250 total concentration in the meteorite ( $\%_M$ ). For A and B, diamonds indicate mean values, error bars indicate standard  
 251 error, yellow vertical lines in panel A indicate 100% values (i.e., same bioleaching efficiency as non-biological  
 252 samples). For C and D, values are shown per element analysed, and per gravity condition (ISS = microgravity, green  
 253 circles, Earth = 1 x g, orange circles). Data from the ISS and Earth experiment are shown C) as percentage differences  
 254 with the non-biological control ( $\%_{NB}$ ); D) as percentage of total concentration in the meteorite ( $\%_M$ ). ISS data in C-D  
 255 are the same as A-B. For C and D, circles indicate mean values; error bars indicate standard error; yellow vertical  
 256 lines in panel C indicate 100% values (i.e., same bioleaching efficiency as non-biological samples).

257 Comparison by ANOVA (S9) suggests that the variable *organism* influences the dissolution of all  
258 the PGEs analysed. Focusing on the ISS samples only, p-values of Tukey pairwise comparisons  
259 for ruthenium, palladium and platinum were  $> 0.05$  in all pairwise comparisons between biological  
260 and non-biological samples, between single species, and between single species versus the  
261 consortium (S10). Two exceptions were found for platinum, for *S. desiccabilis* versus *P.*  
262 *simplicissimum*, or versus the Consortium (p-values = 0.016 in both cases), suggesting different  
263 effect of the two organisms on platinum extraction (S9-10).

264 Metal concentration for all elements were normalised to the relative non-biological controls ( $\%_{\text{NB}}$ )  
265 for the ISS samples, to determine whether the organisms would enhance leaching under  
266 microgravity (Figure 5A, S11). When observing mean  $\%_{\text{NB}}$  values to highlight general bioleaching  
267 trends in space, an enhanced bioleaching for PGEs was present in the presence of *P.*  
268 *simplicissimum* (ruthenium:  $130.6 \pm 19.9\%_{\text{NB}}$ , palladium:  $549.3 \pm 234.4\%_{\text{NB}}$ , platinum:  
269  $118.4 \pm 17.6\%_{\text{NB}}$ ), while it was reduced or unaffected in the presence of *S. desiccabilis* alone  
270 (ruthenium:  $102.9 \pm 14.7\%_{\text{NB}}$ , palladium:  $33.6 \pm 20.1\%_{\text{NB}}$ , platinum:  $78.0 \pm 5.9\%_{\text{NB}}$ ). The Consortium  
271  $\%_{\text{NB}}$  were similar to those of *P. simplicissimum* alone (ruthenium:  $127.8 \pm 14. \%$ , platinum:  
272  $118.2 \pm 9.7\%_{\text{NB}}$ ), except for palladium (Consortium:  $172.4 \pm 40.2\%_{\text{NB}}$  vs *P. simplicissimum*:  
273  $549.3 \pm 234.4\%_{\text{NB}}$ ), whose  $\%_{\text{NB}}$  values were between the fungus and the bacterium (Figure 5A,  
274 S11).

275 Elemental concentrations of ruthenium, palladium and platinum in the ISS samples were compared  
276 to those present in the meteorite ( $\%_{\text{M}}$ ), to calculate the amount leached from the rock by non-  
277 biological and biotic processes under microgravity (Figure 5B, S11). Non-biological leaching  
278 released  $14.8 \pm 2.2\%_{\text{M}}$  ruthenium,  $2.2 \pm 0.6\%_{\text{M}}$  palladium, and  $0.2 \pm 0.0\%_{\text{M}}$  platinum present in the  
279 meteoritic rock. *P. simplicissimum* extracted  $19.3 \pm 3.2\%_{\text{M}}$  ruthenium,  $11.9 \pm 4.8\%_{\text{M}}$  palladium, and

280 0.3±0.1‰M platinum. *S. desiccabilis* extracted 15.2±2.4‰M ruthenium, 0.7±0.4‰M palladium, and  
281 0.2±0.0‰M platinum. The Consortium leached 18.9±2.5‰M ruthenium, 3.7±0.7‰M palladium, and  
282 0.3±0.0‰M platinum of the total in the meteoritic rock, respectively.

## 283 2.5 Microbial bioleaching of PGEs on Earth

284 Similarly to the ISS samples, we compared the Earth samples to determine whether the organisms  
285 would enhance PGEs leaching under terrestrial gravity (Figure 5C, S9-11). On Earth, p-values of  
286 raw concentration comparisons for ruthenium, palladium and platinum were  $\leq 0.05$  in all pairwise  
287 comparisons between biological and non-biological samples, with the exception of *P.*  
288 *simplicissimum* for ruthenium and platinum (S10), while all comparisons between biological  
289 samples had a p-value  $> 0.05$ .

290 Compared to non-biological samples (%<sub>NB</sub>), an enhanced bioleaching was observed in the presence  
291 of *S. desiccabilis* and *P. simplicissimum*, alone or in consortium, for ruthenium and platinum, with  
292 increases spanning between 142.2±19.9%<sub>NB</sub> to 218.9±67.5%<sub>NB</sub>. In contrast, leaching of palladium  
293 was reduced on Earth in the presence of the microbial species (*S. desiccabilis*: 0.2±0.2%<sub>NB</sub>, *P.*  
294 *simplicissimum*: 41.6±22.5%<sub>NB</sub>, Consortium: 30.6±6.1%<sub>NB</sub>)(Figure 5C, S11). Relative to the  
295 amount present in the rock (%<sub>M</sub>), non-biological samples released 6.59±2.13‰M ruthenium,  
296 29.47±6.47‰M palladium, and 0.13±0.02‰M platinum, *P. simplicissimum* extracted 12.4±2.4‰M  
297 ruthenium, 12.3±6.7‰M palladium, and 0.2±0.0‰M platinum. *S. desiccabilis* extracted  
298 14.3±2.3‰M ruthenium, 0.1±0.1‰M palladium, and 0.2±0.0‰M platinum. Finally, the Consortium  
299 leached 14.4±1.9‰M ruthenium, 9.0±1.9‰M palladium, and 0.2±0.0‰M platinum (Figure 5D,  
300 S11).

301

## 302 **2.6 Effect of microgravity on microbial-mediated PGEs bioleaching**

303 Together with the influence of the *organism*, ANOVA results suggested that the variable *gravity*  
304 influences the dissolution of all the PGEs elements analysed (S9). The interaction between the  
305 variables *gravity* and *organism* has an effect for palladium and platinum, but not ruthenium (S9).  
306 To reveal the effect of gravity on overall leaching, we compared the raw concentrations of element  
307 extracted (ng/mL, equivalent to comparing %<sub>M</sub>) by performing Tukey pairwise comparisons  
308 between ISS and Earth samples harbouring the same organism(s). To analyse the effect of gravity  
309 on the organisms, we performed the same comparisons using a Student T test on the concentrations  
310 normalised for the non-biological controls (%<sub>NB</sub>), which allowed to remove the effect of abiotic  
311 leaching in our samples. For ruthenium and palladium, all comparisons between %<sub>M</sub> and between  
312 %<sub>NB</sub> produced p-values > 0.05 (S11, Figure 5C-D), with the exception of %<sub>NB</sub> of the Consortium  
313 for palladium, which produced a p-value = 0.009 (ISS 172.4±40.2%<sub>NB</sub> vs Earth 30.6±6.1%<sub>NB</sub>). For  
314 platinum, comparison between %<sub>M</sub> for *P. simplicissimum* samples reported a p-value of 0.007,  
315 with leaching values of 0.3±0.0%<sub>M</sub> (0.26±0.03ng/mL) on the ISS, and 0.2±0.0%<sub>M</sub>  
316 (0.17±0.02ng/mL) on Earth (Figure 5C-D, S10-11). However, comparison between %<sub>NB</sub> had p-  
317 value > 0.05. Comparison between %<sub>NB</sub> for *S. desiccabilis* produced a p-value = 0.01 (ISS  
318 78.0±5.9%<sub>NB</sub> vs Earth 166.1±12.3%<sub>NB</sub>), while comparison of %<sub>M</sub> was > 0.05. All other  
319 comparisons produced p-values > 0.05.

## 320 **2.7 Bioleaching of other elements on ISS and Earth**

321 Among the 22 elements analysed whose ANOVA revealed relevant results (see paragraph 2.4),  
322 and beside PGEs, 15 further elements produced p-values ≤ 0.05 for at least one biologically-  
323 relevant pairwise comparison, either when comparing the raw concentrations or the %<sub>NB</sub> (S9,  
324 Supplementary excel file).

325 Comparing ISS samples only, pairwise comparisons for phosphorus revealed a p-value of 0.049  
326 for *P. simplicissimum* versus non-biological control under microgravity, with  $185.9 \pm 35.3\%_{\text{NB}}$  and  
327  $0.26 \pm 0.04\%_{\text{M}}$ . Other pairwise comparisons for phosphorus and for the other 14 elements showed  
328 p-values  $> 0.05$  (S9, S12-13, Supplementary excel file), nevertheless analysis of average extraction  
329 values allowed to highlight potential bioleaching trends. We chose a threshold of  $\geq 1.5$ -fold change  
330 to compare mean  $\%_{\text{NB}}$  values. Compared to non-biological samples, copper leaching was reduced  
331 (0.4-fold of the non-biological) by *S. desiccabilis*. while *P. simplicissimum* alone and in  
332 Consortium increased phosphorus leaching 1.6-fold (fungus) to 1.9-fold (Consortium). Moreover,  
333 the fungus (alone and in Consortium) compared to the bacterium increased bioleaching of  
334 phosphorus (fungus: 1.7-fold; Consortium: 1.6-fold), vanadium (fungus: 2.0-fold; Consortium:  
335 1.8-fold) and copper (fungus: 2.8-fold; Consortium: 2.9-fold; S12-13). No average  $\%_{\text{NB}}$  increase  
336 was present comparing the fungus and the Consortium (S12-13).

337 For Earth, p-values  $\leq 0.05$  for pairwise comparisons of biological versus non-biological samples  
338 (Supplementary excel file) were found for potassium (p=0.009 *S. desiccabilis*; p=0.005  
339 Consortium), vanadium (p=0.015 *P. simplicissimum*; p=0.0007 Consortium), manganese (p=0.015  
340 *S. desiccabilis*, p=0.048 *P. simplicissimum*, p=0.006 Consortium), iron (p=0.00006 *S. desiccabilis*;  
341 p=0.004 Consortium), nickel (p=0.004 *S. desiccabilis*; p=0.008 Consortium), strontium (p=0.042  
342 *S. desiccabilis*; p=0.019 Consortium), zirconium (p=0.015 *S. desiccabilis*; p=0.006 Consortium),  
343 molybdenum (p=0.003 *S. desiccabilis*), barium (p=0.0016 Consortium) and europium (p=0.033  
344 Consortium). When comparing average  $\%_{\text{NB}}$  as above ( $\geq 1.5$ -fold increase threshold), *S.*  
345 *desiccabilis* showed a higher extraction capacity than *P. simplicissimum* for 3 out of 15 elements,  
346 namely iron (1.7-fold), cobalt (1.9-fold), and molybdenum (1.6-fold), while the fungus compared  
347 to the bacterium increased copper leaching (2.1-fold). The fungus also increased copper extraction

348 compared to the Consortium (2.4-fold), while this latter did not improve bioleaching compared to  
349 the single organisms (S12-13, Supplementary excel file).

350 To highlight the effect of gravity on bioleaching, comparisons between gravities in same-organism  
351 samples were analysed (S12-13, Supplementary excel file). P-values of raw concentration pairwise  
352 comparisons were  $\leq 0.05$  only for lutetium with the fungus alone ( $0.057 \pm 0.001\%_{\text{M}}$  ISS vs  
353  $0.003 \pm 0.001\%_{\text{M}}$  Earth). When comparing  $\%_{\text{NB}}$ , p-values of the Consortium were  $\leq 0.05$  for sodium  
354 ( $117.57 \pm 6.24\%_{\text{NB}}$  ISS vs  $86.53 \pm 3.78\%_{\text{NB}}$  Earth), copper ( $125.38 \pm 13.51\%_{\text{NB}}$  ISS vs  
355  $31.92 \pm 14.42\%_{\text{NB}}$  Earth) and zinc ( $134.27 \pm 17.05\%_{\text{NB}}$  ISS vs  $92.53 \pm 4.76\%_{\text{NB}}$  Earth). Zinc is in  
356 addition to the 15 elements discussed above, since raw concentration pairwise comparisons did  
357 not report relevant p-values (S9), while pairwise comparisons of the  $\%_{\text{NB}}$  for the Consortium  
358 produced a p-value = 0.04 (Supplementary excel file). All other pairwise comparisons, either for  
359 the raw concentrations or for the  $\%_{\text{NB}}$ , were  $> 0.05$ . Similarly to above, we analysed mean  $\%_{\text{NB}}$   
360 values to highlight general trends related to the effect of gravity. *S. desiccabilis* leaching showed  
361  $\geq 1.5$ -fold increase leaching on Earth compared to ISS for 10 out of 15 elements, namely barium  
362 (2.0-fold), cobalt (2.3-fold), europium (2.1-fold), iron (4.1-fold), manganese (2.0-fold),  
363 molybdenum (2.9-fold), nickel (2.0-fold), strontium (1.7-fold), vanadium (4.1-fold) and zirconium  
364 (1.9-fold). *P. simplicissimum*, alone and in Consortium, showed higher average  $\%_{\text{NB}}$  in  
365 microgravity compared to Earth gravity for phosphorus (fungus: 1.7-fold; Consortium: 1.6-fold)  
366 and copper (fungus: 1.6-fold; Consortium: 3.9-fold), but higher on Earth for 9 out of 15 elements,  
367 namely barium (fungus: 2.3-fold; Consortium: 2.9-fold), cobalt (fungus: 1.5-fold; Consortium:  
368 2.2-fold), europium (fungus: 1.6-fold; Consortium: 2.1-fold), iron (fungus: 2.5-fold; Consortium:  
369 3.6-fold), manganese (fungus: 1.8-fold; Consortium: 2.0-fold), molybdenum (fungus: 1.8-fold;

370 Consortium: 2.4-fold), nickel (fungus: 1.5-fold; Consortium: 1.9-fold), strontium (fungus: 1.6-  
371 fold; Consortium: 1.8-fold) and vanadium (fungus: 2.3-fold; Consortium: 3.3-fold).

## 372 **2.8 Effect of microgravity on abiotic leaching**

373 To test the effect of the gravity condition on the abiotic leaching from the meteorite rock,  
374 comparisons between non-biological samples in microgravity (ISS) and Earth gravity (Earth) were  
375 measured.

376 For PGEs (Figure 5C-D, S10-11), this comparison reported a p-value  $\leq 0.05$  for palladium and  
377 platinum, but not ruthenium (S10-S11), with mean extraction from the rock of  $14.8 \pm 2.2\%_M$  in  
378 microgravity versus  $6.6 \pm 2.1\%_M$  under terrestrial gravity for ruthenium,  $2.2 \pm 0.6\%_M$  on ISS versus  
379  $29.5 \pm 6.7\%_M$  on Earth for palladium, and  $0.2 \pm 0.0\%_M$  in microgravity versus  $0.13 \pm 0.02\%_M$  under  
380 terrestrial gravity for platinum.

381 Besides palladium and platinum, other 9 elements reported a p-value  $\leq 0.05$  for pairwise  
382 comparisons of non-biological controls under microgravity versus Earth gravity. These are, in  
383 order of atomic number, sodium, aluminium, scandium, iron, cobalt, nickel, strontium,  
384 molybdenum, and erbium (S9, Supplementary excel file).

385 Compared to Earth samples, enhanced abiotic leaching in microgravity was observed for  
386 aluminium (6.8-fold increase in ISS vs Earth; ISS:  $1.52 \pm 0.95\%_M$ , Earth:  $0.22 \pm 0.12\%_M$ ), scandium  
387 (3.4-fold; concentration in the rock was not detected. Absolute values in the leachate: ISS =  
388  $0.020 \pm 0.008$  ng/mL, Earth =  $0.006 \pm 0.002$  ng/mL), iron (4.3-fold; ISS:  $0.12 \pm 0.01\%_M$ , Earth  
389  $0.03 \pm 0.01\%_M$ ), cobalt (2.5-fold; ISS:  $0.50 \pm 0.09\%_M$ , Earth:  $0.21 \pm 0.07\%_M$ ), nickel (2.4-fold; ISS:  
390  $0.15 \pm 0.01\%_M$ , Earth:  $0.06 \pm 0.01\%_M$ ), strontium (1.8-fold, ISS:  $0.39 \pm 0.01\%_M$ , Earth:  
391  $0.21 \pm 0.04\%_M$ ), molybdenum (2.9-fold, ISS:  $0.03 \pm 0.01\%_M$ , Earth:  $0.01 \pm 0.00\%_M$ ) and erbium (2.4-

392 fold, ISS:  $0.003 \pm 0.0004\%_M$ , Earth:  $0.001 \pm 0.0004\%_M$ ). Abiotic leaching was higher under  
 393 terrestrial gravity for sodium (1.4-fold increase on Earth; ISS:  $0.57 \pm 0.07\%_M$ , Earth:  
 394  $0.82 \pm 0.11\%_M$ ). Silicon showed a similar result (ISS:  $0.0097 \pm 0.001\%_M$ , Earth:  $0.011 \pm 0.001\%_M$ ),  
 395 but these values might be suboptimal due to the compromised silicon detection in the rock (see  
 396 materials and methods), and hence excluded from further analysis (S9, Supplementary excel file).

## 397 2.9 Metabolomics of biomining-related features

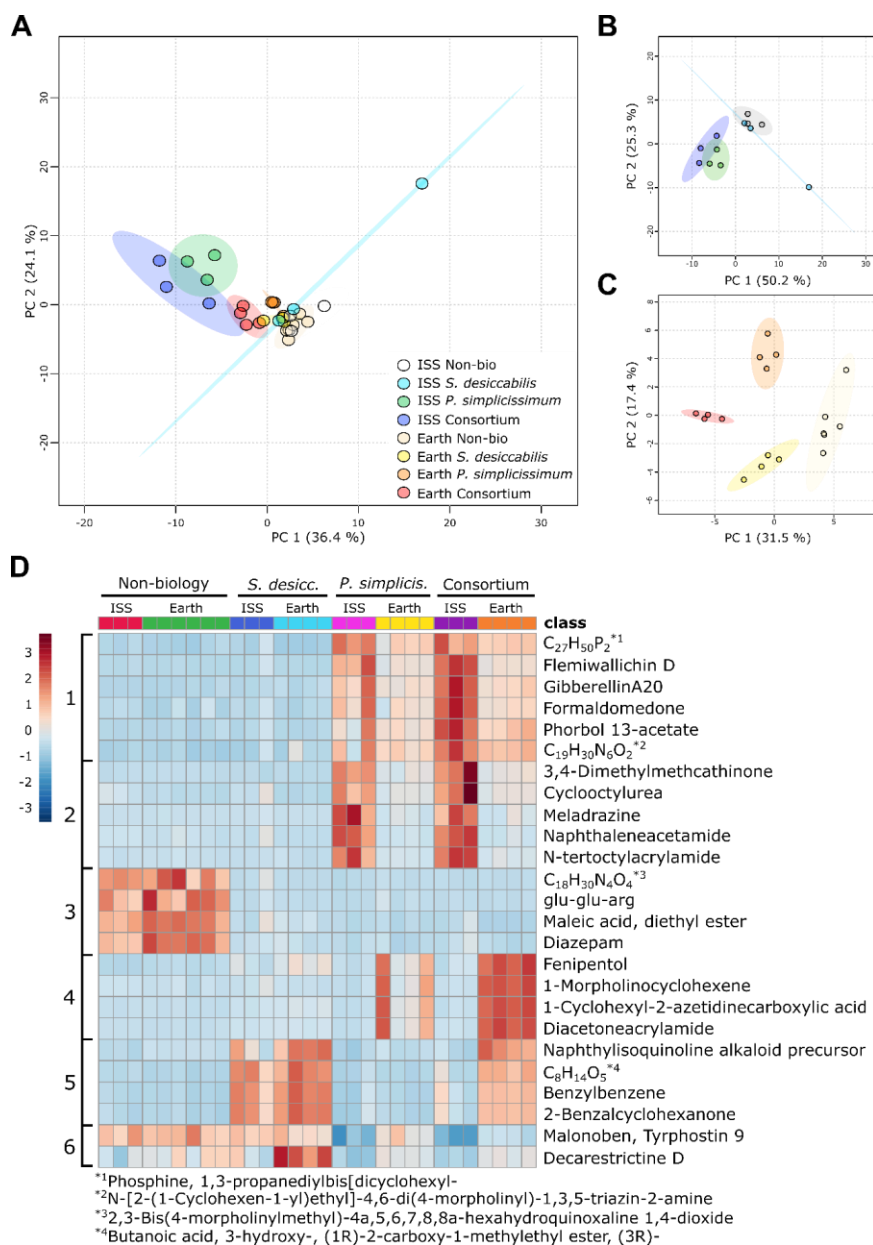



399 **Figure 6 Metabolomic analysis of microorganisms during microbe-meteorite interaction in space and on Earth.** A)  
400 Principal component analysis (PCA) representing all the samples; B) PCA showing ISS samples only; C) PCA  
401 showing Earth samples only. Ellipses correspond to 95% confidence intervals. D) Heatmap showing the top 25  
402 features measured in the metabolomics analysis, clustered by gravity condition and organism. Each column represents  
403 a single sample. Numbers of the left represent visual clusters suggesting metabolomic patterns dependent on the  
404 organism and/or the gravity condition. Heatmap legend is on the left side of the figure, indicating red colours for  
405 higher concentrations and blue for lower concentrations of features in each specific sample. Features with long names  
406 were indicated with their chemical formula, with asterisks showing the complete names at the bottom of the figure.

407 In order to determine whether microgravity alters the metabolome of biomining microorganisms,  
408 and thus plays a role in their different behaviour in space, we conducted a metabolomics analysis  
409 of the liquid fraction of the samples after the experiment. Principal component analysis (PCA) of  
410 the whole set of samples, both in microgravity (ISS) and Earth gravity (Earth), showed an  
411 overlapping of all the samples, with the exception of a single outlier (an ISS *S. desiccabilis*  
412 sample), indicating the lack of a significant component that could allow the discrimination of the  
413 samples based on gravity condition or organism (Figure 6A). PC1 and PC2 taken together explain  
414 only a 60.5% of the observed variance. The PCA analysis is in accordance with the volcano plot  
415 analysis (S14), showing a larger number of up- or downregulations of features in space compared  
416 to Earth for the fungus-containing samples, compared to those non containing the fungus.

417 To better appreciate metabolomics characteristics regardless of the gravity condition, PCAs of  
418 space only (Figure 6B) and Earth only (Figure 6C) sample were produced. PCA analysis of the  
419 space samples (Figure 6B) shows *S. desiccabilis* cluster partially overlapping with the non-  
420 biological cluster, with the exception of one outlier sample. It also shows the fungus-containing  
421 samples clustering together and separately from the non-biological controls and the *S. desiccabilis*  
422 samples. PC1 and PC2 together explain a total of the 75.5% of the variance.

423 PCA analysis of the Earth samples alone (Figure 6C) shows 4 separate clusters, indicating that,  
424 under terrestrial gravity conditions, *S. desiccabilis*, *P. simplicissimum* and the two organisms in  
425 the Consortium present different metabolic profiles. Notably, the separation in four distinguished  
426 clusters may indicate a minor or null effect of the contaminants (S3), if present, on the  
427 metabolomics analysis.

428 Figure 6D shows a heatmap of the top 25 features measured in the liquid fractions of the  
429 BioAsteroid samples. The heatmap allows the identification of clear clustering of features, specific  
430 to the gravity condition and/or the organism. Cluster 1 represents metabolites produced in the  
431 presence of the fungus, either as a single culture or in the Consortium, in both gravity conditions.  
432 A higher presence in microgravity (ISS) is however evident. Cluster 2 represents features  
433 expressed almost solely in the presence of *P. simplicissimum* in space. Cluster 3 shows features  
434 present in the non-biological control samples regardless of gravity condition. Complementary to  
435 cluster 2, cluster 4 shows features associated with the presence of the fungus when subjected to  
436 Earth gravity. Cluster 5 shows features mostly associated with the presence of *S. desiccabilis*,  
437 regardless of the gravity condition when alone, and under terrestrial gravity when in Consortium.  
438 This might indicate either lack of production of these features in the presence of the fungus, or  
439 their fungal degradation/metabolization, in microgravity. Cluster 6 represents features less  
440 expressed in the presence of the fungus in both gravity conditions. The patterns shown here are  
441 similar to those observed in the heatmap showing the top 70 features (S15).

### 442 **3. Discussion and conclusion**

443 Space biomineralization is an area of space activity with substantial interest, since it offers the promise of  
444 supporting *in-situ* resource utilisation (ISRU), obtaining and recycling materials in extraterrestrial  
445 settlements, and enhancing the self-sustainability of human space exploration<sup>4,16</sup>. In this work, we

446 tested the proof of concept for bacterial and fungal bioleaching of asteroidal rock material (L-  
447 chondrite) in microgravity, onboard the ISS.

448 Focusing on PGEs, we observed that the mean leaching of palladium for the fungus *P.*  
449 *simplicissimum* was 549.3% of the non-biological control on the ISS, and mean leaching of  
450 ruthenium and platinum was slightly higher than the non-biological control. These results suggest  
451 that a fungus can be used to increase mean leaching rates of certain PGEs from asteroidal material  
452 in microgravity. However, we also observed that there was great variability around the mean,  
453 leading to p-values > 0.05 when biological extraction was compared to non-biological controls.  
454 This variability could be caused by intrinsic differences in growth rates between our replicates, but  
455 it might also reflect genuine heterogeneities in biomining. As we showed in our geological and  
456 geochemical analysis, the meteorite used is a heterogeneous mixture of mineral fragments which,  
457 despite being quite consistent in concentration, could have been exposed on the surface in different  
458 proportions. Thus, variability could be an intrinsic part of biomining process in this experiment,  
459 especially since we were working with small volumes of rock pulp and with a small number of  
460 replicates, an inevitable limitation of space experiments.

461 We observed different results with the bacterium *S. desiccabilis* in microgravity. PGEs mean  
462 leaching was similar (ruthenium) or lower (palladium and platinum) with the organism compared  
463 to the non-biological control, suggesting that this organism did not successfully extract PGEs from  
464 L-chondrite in microgravity. Although biofilms are generally thought to be beneficial for  
465 bioleaching<sup>24,48</sup>, they have also been shown to protect metal and concrete surfaces from biotic and  
466 abiotic corrosion<sup>49-51</sup>, through the production of polysaccharides. Hence, a possible explanation of  
467 the reduction in mean leaching for *S. desiccabilis* in microgravity can reside in its well-known  
468 biofilm and polysaccharide production capacity<sup>52</sup>. SEM images show biofilm formation on the

469 rock surfaces in both gravity conditions, although their sporadic nature does not allow us to  
470 definitely link biofilm growth to potential leaching rates in the two gravity conditions tested. The  
471 general impairment of *S. desiccabilis* bioleaching in microgravity compared to observations on  
472 Earth is partially in accordance to our previous space biomineralization experiment, BioRock<sup>31,32</sup>, in  
473 which *S. desiccabilis* extraction of REEs and vanadium from basaltic rock (a different rock from  
474 that of this experiment) had a reduced trend in microgravity, compared to simulated Martian and  
475 terrestrial gravities. In BioRock, *S. desiccabilis* extracted a mean value of vanadium of 184.92%  
476 of the non-biological control from the basalt rock in microgravity<sup>31</sup>, compared to 71.40% from the  
477 L-chondrite in this experiment, suggesting an effect of the starting rock material. Only the REEs  
478 europium and lutetium were bioleached by the bacterium in this work (mean values), compared to  
479 the whole range of REEs extracted in BioRock<sup>32</sup>. Lutetium is a heavy REEs, which were  
480 preferentially extracted in BioRock and in other experiments reported in the literature<sup>32,53</sup>.

481         When we used a consortium of both the bacterium and fungus together, we found that mean  
482 leaching rates were higher than non-biological controls for all three PGEs in microgravity, but  
483 again, variability in mining efficiency meant that p-values were greater than 0.05. Mean values  
484 reported a similar enhancement between the consortium and the fungus alone for ruthenium and  
485 platinum, suggesting the fungus dominates the bioleaching activities for these elements, while for  
486 palladium we did not observe the same enhancement with the consortium as with the fungus alone.  
487 This may be explained by the fact that the bacterium strongly reduced mean palladium leaching  
488 when used alone (33.6%<sub>NB</sub>) and may counteract the beneficial effects of the fungus in this case.

489 We also investigated the bioleaching on a range of 41 further elements, 15 of which showed  
490 alterations between the conditions tested. Aside from palladium, total fungal leaching of  
491 phosphorus (compared to non-biological) was enhanced in microgravity, showing how

492 microorganisms might be employed to extract other crucial elements required in industry, and that  
493 materials for life support systems might be bioextracted from asteroidal materials. All other  
494 comparisons between ISS samples provided p-values  $> 0.05$ . However, mean values for copper  
495 were lower in the presence of the microorganisms, particularly the bacterium, compared to the  
496 non-biological control in microgravity. This suggest that, in some cases, abiotic leaching could be  
497 a preferable way to mine in space, with organisms potentially inhibiting leaching, as we also  
498 observed for *S. desiccabilis* and the PGEs. The fungus, alone and in consortium, caused higher  
499 mean %<sub>NB</sub> bioleaching of phosphorus compared to the non-biological control, and of phosphorus,  
500 vanadium and copper, compared to the bacterium. Similarly to ruthenium and platinum, mean  
501 values for the fungus and the consortium were similar.

502 Underlying our biological observations may be changes in the abiotic rate of leaching. Compared  
503 to terrestrial gravity controls, 11 elements (including 2 PGEs) showed changes in their abiotic  
504 leaching in microgravity. Two of these showed reduced leaching under microgravity, while the  
505 remaining 9 showed an increased leaching, including platinum (1.84-fold increase in ISS vs Earth).  
506 This is consistent with our previous observation that mean abiotic leaching values for REEs  
507 increased with decreasing gravity regimens (Earth gravity, Mars gravity and microgravity,  
508 respectively) onboard the ISS<sup>32</sup>. Among those that showed decreased abiotic leaching under  
509 microgravity was the PGE element palladium (13.6-fold decrease in ISS vs Earth), where absolute  
510 leaching rates for *P. simplicissimum* were similar for Earth and space. This means that the fungus  
511 allowed a net 13.2-fold increase in palladium extraction in space, opening fascinating scenarios  
512 for future space biomining and ISRU technologies. Similar results were found for sodium. A  
513 reduction in abiotic leaching of some elements in microgravity is difficult to explain. One possible  
514 hypothesis is that the different fluid dynamics in microgravity (i.e. lack of convection), compared

515 to terrestrial gravity, could have enhanced local saturation of the leached elements around the rock  
516 surface<sup>54</sup>, in turn reducing abiotic leaching. However, this would not explain why this was only  
517 observed for certain elements. These results emphasise the necessity of selecting the most  
518 appropriate technology when planning ISRU. Indeed, they demonstrate that biomining may be  
519 beneficial for palladium and sodium (and probably silicon) extraction in space, for instance, but  
520 not for other elements. They also indicate that the benefits of utilising microorganisms in space  
521 mining lie not only in their ability to increase absolute leaching in some cases, but also to maintain  
522 stable leaching rates against a potential reduction in abiotic leaching in other instances.

523 When analysing the Earth results, many comparisons between biological and non-biological  
524 controls revealed a p-value  $\leq 0.05$ . The presence of *S. desiccabilis*, alone or in consortium, had a  
525 positive effect on bioleaching of ruthenium, platinum, potassium, vanadium, manganese, iron,  
526 nickel, strontium, zirconium, and molybdenum. *P. simplicissimum*, alone and in consortium,  
527 improved the extraction of vanadium and manganese, compared to the non-biological control. The  
528 consortium alone improved the extraction of barium and europium, where the single species did  
529 not enhance leaching in comparison to the non-biological control. When comparing organisms in  
530 the terrestrial samples, *S. desiccabilis* showed higher mean leaching capacity (%<sub>NB</sub>) for 5 of the 18  
531 (considering the three PGEs) elements compared to the fungus. *Viceversa*, the fungus extracted  
532 only copper better than the bacterium and the consortium, and the consortium did not improve  
533 bioleaching compared to single species. Taken together, these results indicate *S. desiccabilis* has  
534 a wider bioleaching capacity than *P. simplicissimum*, in terms of number of elements extracted  
535 from the meteorite materials, under terrestrial gravity.

536 We therefore compared experiments in microgravity and in terrestrial gravity for all the elements  
537 we studied, to highlight the effect of gravity on the bioleaching efficacy of the two organisms

538 tested. Aside from platinum, *P. simplicissimum* %<sub>M</sub> extraction of lutetium, and consortium %<sub>NB</sub>  
539 extraction of sodium, copper and zinc, were higher in microgravity than terrestrial gravity. All  
540 other comparisons provided a p-value > 0.05, however mean %<sub>NB</sub> bioleaching values of 10  
541 elements for the bacterium, and 9 for the fungus and the consortium, were lower in microgravity  
542 compared to terrestrial gravity.

543 Taken together, these results show the complexity of the biomining process, particularly under  
544 space conditions. Understanding the effect of microgravity on bioleaching will depend on the  
545 microorganism, whether it is alone or in consortium, and on the characteristic of the  
546 element/mineral/rock, or a combination of these. Microgravity can also influence abiotic leaching.  
547 These results highlight the need to carefully select optimal combinations of microorganism(s),  
548 rock substrate, and leaching conditions for successful biomining setting, either in space or on  
549 Earth. It also indicates that it is difficult to predict *a priori* how to go about extracting a chosen  
550 element from asteroids, without carrying out experiments to test each condition. In some instances,  
551 abiotic leaching should be preferred to bioleaching, and costs/benefits should be carefully  
552 considered case by case.

553 Comparisons of the biological rates of leaching on Earth versus space needs to be tempered with  
554 caution, due to the contaminations observed during the CFU analysis for some of the biological  
555 Earth samples. The analysis of the DNA extracted from the *S. desiccabilis* and the Consortium  
556 Earth samples suggests that either the contamination was not present in the original samples, or  
557 that *S. desiccabilis* dominates it, in accordance with the CFU numbers (i.e., contaminants' CFU  
558 concentration is 5-6 orders of magnitude lower than that of *S. desiccabilis*, S3). Results on these  
559 samples are therefore considered accurate. Results on the fungal Earth samples suggested a  
560 contamination from the order Bacillales (probably belonging to the genera *Bacillus* and/or

561 *Paenibacillus*). We can hypothesise that any relevant effect of the contamination would have likely  
562 influenced all the affected samples equally. From the metabolomics analysis we note this is not  
563 the case, as suggested by the absence of contaminant-related clusters in the heatmap results and  
564 the PCA analysis. This might indicate that, if any effect was present, this does not have a relevant  
565 impairing role on the results. We were not able to repeat the experiment to test these hypotheses,  
566 due to the unavailability of identical material from the same L-chondrite meteorite. However, even  
567 when the Earth fungal results require these caveats, the other results are completely valid.

568 We were also interested to determine whether microgravity conditions would alter the metabolome  
569 of biomining organisms. Metabolomics analysis revealed clear biologically relevant patterns that  
570 highlight the influence of the space condition and of gravity on the microbial metabolism. PCA  
571 analysis on the ISS samples reveals two main clusters, partially overlapping, namely one that  
572 groups the non-biological controls with the bacterium samples, and a second that groups together  
573 the fungus-harboring samples. Indeed, of the biological systems we studied, the fungal metabolic  
574 pattern was the most influenced by microgravity, both in the consortium and as a single-species  
575 (Figure 6D, Clusters 1-2; S15 Cluster 1). This potential effect of microgravity on the secondary  
576 metabolite production of the fungus, only partially influenced by its presence in a consortium or  
577 in a single species culture, is corroborated by the PCA clustering.

578 Data on microbial metabolomics under real or simulated microgravity are still scarce and are  
579 mostly focused on bacterial rather than fungal metabolites<sup>55</sup>. Secondary metabolites of interest in  
580 previous experiments were mostly antibiotics, but also molecules such as poly- $\beta$ -hydroxybutyrate  
581 (a polyester)<sup>56</sup>. Their production has been seen to increase, decrease or be unaffected by the gravity  
582 conditions, indicating experimental methods should be carefully selected in order to have  
583 comparable results, but also a non-trivial effect of the space conditions on microbial metabolism<sup>55</sup>.



584 Analysis of the single metabolites allowed insights into the metabolic pathways associated with  
585 the presence of the meteorite, the bioleaching capacity of the organism and the gravity condition.  
586 Specific mechanisms of *Sphingomonas* spp. and *P. simplicissimum* bioleaching include organic  
587 acids production, such as citric, oxalic, malic and glucuronic acids<sup>57,58</sup>. While we could not identify  
588 these three specific organic acids in our result, features of interest from the bioleaching perspective  
589 include carboxylic acids and siderophore-associated molecules. Linked with the presence of *S.*  
590 *desiccabilis* alone or in the consortium in both gravities: (i) a butanoic acid derivate, (ii) the  
591 carboxylic acid 2'-Deoxymugineicacid, (iii) Quinoline-3,4-diol linked with biofilm formation. In  
592 fungal ISS samples we identified (i) Phosphine, 1,3-propanediylbis[dicyclohexyl]-, which has been  
593 associated with chemical palladium-catalysed carbonylation (although its biological activity is  
594 unknown)<sup>59</sup>, (ii) the fatty acid Undeca-2,5-dienal, and (iii) 2,3-Dihydro-2,3-dihydroxybenzoic,  
595 both acid associated with bacterial siderophore biosynthesis. Linked with the fungal presence on  
596 Earth samples we found (i) 1-Morpholinocyclohexene which, although not reported to be  
597 associated to bioleaching *per se*, belongs to the morpholino-compounds class which are known to  
598 perform abiotic metal dissolution<sup>60</sup>, (ii) the carboxylic acids 1-Cyclohexyl-2-azetidincarboxylic  
599 acid, (iii) the carboxylic acids 1-Cyclohexyl-2-azetidincarboxylic acid and (iv) hexanoic acid.  
600 These features are thus good candidate for future research, focused on both understanding the  
601 bioleaching mechanisms of the two organisms, and bioengineering endeavours.

602 Notably, a number of compounds of pharmaceutical interest were also identified. These include  
603 Laster A<sup>61</sup>, Flemiwallichin D (a chalcone flavonoid)<sup>62</sup>, Sarcoehrendin D (a prostaglandine  
604 derivative), and lauro lactam, all associated with the presence of *P. simplicissimum* in ISS samples  
605 (S15, Cluster 1). Lauro lactam is used for the production of plastics such as polyamide 12 (nylon  
606 12) and copolyamides<sup>63</sup>. Although its natural bioproduction has not been reported, its presence in

607 the fungal-containing cluster opens speculation on potential bioplastic production in space. Many  
608 of the features present in the top 70 list (S15) were of unknown relevance for the aim of our  
609 experiment, showing that we still have much to learn about the complex metabolic restructuring  
610 that occurs under space conditions as well as the functions of many metabolites. Compared to  
611 space samples, PCA analysis of the Earth samples forms four diverse groups. These results suggest  
612 that under terrestrial gravity conditions the metabolome is more plastic and adaptable, allowing  
613 diverse response to different biological conditions, but note our observations about contaminant  
614 species.

615 These data show that microgravity can have profound effects on biomining organisms. Although  
616 we have identified a range of metabolites that might be linked to biomining, the role of many of  
617 these metabolic changes remains enigmatic. This demonstrate that understanding and predicting  
618 biomining processes on asteroids may ultimately be linked to our grasp of the metabolic response  
619 of organisms in space. In particular, as we show here, changes in the metabolome of biomining  
620 organisms may even lead to changes in other compounds with human health and industrial  
621 implications.

622 We carried out investigations on the cell numbers using different methods (Figure 3, S2-3). These  
623 results provide different answers depending on the technique used. For instance, the higher final  
624 cell concentration for *S. desiccabilis* measured with the CFU method is not corroborated by flow  
625 cytometry, which did not show differences between gravity conditions. CFU results for *P.*  
626 *simplicissimum* identified a higher concentration under microgravity compared to terrestrial  
627 gravity, while a lower concentration is reported by the other two methods. There results may have  
628 some bearing on the widely inconsistent reports of the effects of space on microorganisms<sup>55,64</sup>.  
629 The interplay of viability, metabolic states and other factors may influence how the effects of

630 microgravity are manifested in cell numbers depending on the method used to measure them. Thus,  
631 experiments investigating the effects of microgravity should choose the method of analysis  
632 carefully and preferably more than one method should be used.

633 Finally, we provided a demonstration of bacterial and fungal interaction with extraterrestrial  
634 minerals under microgravity conditions, on the ISS. Both bacterial biofilms and fungal mycelium  
635 grew on the meteorite fragments, both alone and in consortium. Qualitatively speaking, the  
636 microorganisms are frequently associated with magnesium-, oxygen- and silicon-harboring  
637 minerals (silicate minerals), rather than sulphur- and iron- ones (sulphide minerals). This could  
638 plausibly be caused by the greater diversity of elements available in the silicate minerals compared  
639 to the sulphides, which are relatively pure. No particular morphological difference could be  
640 reported when observing microbial-mineral interaction in microgravity or on Earth. Although our  
641 results are of qualitative nature, to our knowledge they represent the first demonstration of  
642 metabolically-active microbe-meteorite interaction, and of mycelium formation on extraterrestrial  
643 materials, in space. The results reported here are relevant not only from the industrial perspective  
644 of biomining, either space or Earth associated, but because rock weathering can be used to produce  
645 soils and release elements for life support systems<sup>2,4-6,65</sup>, such as phosphorus, potassium and iron.

## 646 **4. Material and methods**

### 647 **4.1 Strains and medium**

648 The microbial species used for this work were the bacterium *Sphingomonas desiccabilis* CP1D<sup>66</sup>,  
649 a Gram-negative, non-motile and non-spore-forming bacterium, first isolated from soil crusts in  
650 the Colorado plateau<sup>39</sup> with demonstrated capacity to extract metals during spaceflight<sup>31,32</sup>, and  
651 the fungus *Penicillium simplicissimum* DSM 1078 (DSMZ), an Ascomycota known for its capacity  
652 to perform biomining<sup>43,67</sup>.

653 The medium used for this experiment was a solution of 50 % (v/v) R2A medium (Reasoner &  
654 Geldreich, 1985), chosen to encourage bacteria to extract nutrients from the meteorite. Five  
655 millilitre of medium were used in this experiment for each sample. The medium composition was  
656 (g L<sup>-1</sup>): yeast extract 0.25; peptone 0.25; casamino acids 0.25; glucose 0.25, soluble starch 0.25,  
657 Na-pyruvate 0.15; K<sub>2</sub>HPO<sub>4</sub> 0.15; MgSO<sub>4</sub>·7H<sub>2</sub>O 0.025 at pH 7.2.

658 The fixative selected to prevent degradation of the biological portions and to stop microbial growth  
659 after the end of the experiment was RNAlater (Thermo Fisher), an aqueous and non-toxic storage  
660 solution compatible with the astronaut safety requirements on the ISS. One millilitre of fixative  
661 was used for each sample, with a final volume ratio of 1:5 fixative-medium.

## 662 **4.2 Rock samples**

663 The extraterrestrial rock sample used for this work was the Northwest Africa (NWA) 869  
664 meteorite, a L3-6 chondrite regolith breccia<sup>68,69</sup>. A portion of the meteorite was crushed into  
665 irregular pieces of approximately 1-3.5 mm of diameter. Rock fragments were aliquoted in samples  
666 of 0.79±0.14 g (mean±st. dev.) each and sterilised by dry-heat sterilisation in a hot air oven  
667 (Carbolite Type 301, UK) for 4 h at 250 °C. The meteorite was characterized as described in  
668 sections 4.7, 4.8 and 4.10.

669 Average surface area of the meteorite fragments was measured by gas adsorption analysis  
670 (Quantachrome, Nova Touch), to measure the surface available to the microorganisms for  
671 bioleaching and biofilm formation. The average surface area for the meteorite's fragments was  
672 1.941±0.181 m<sup>2</sup>/g (mean±standard error, n=3), hence each sample provided ~1.5 m<sup>2</sup> of surface  
673 available.

### 674 **4.3 Sample preparation for the spaceflight**

675 Single strain cultures of each species were desiccated on sterile rock samples.

676 For *S. desiccabilis* CP1D, an overnight culture of the microorganism was grown in 100% (v/v)  
677 R2A medium at 20-22 °C. When the culture reached stationary phase ( $OD_{600} = 0.88 \pm 0.09$ ,  
678 corresponding to  $4.7 \times 10^{10}$  CFU/mL), crushed sterile meteorite was soaked in 1 mL of the bacterial  
679 culture for *S. desiccabilis* and Consortium cultures and samples were air-dried at ~20-25 °C in a  
680 laminar flow hood under sterile conditions.

681 The mycelium of a 7-day old pre-culture of *P. simplicissimum* (50 mL) was dissolved by sonication  
682 (Microson ultrasonic cell disruptor, Misonix) with continuous pulse at setting 3 for 2 minutes, and  
683 then filtered through a sterile cotton bud to remove larger bids of mycelium and obtain a  
684 homogeneous fungal solution. This procedure did not alter fungal viability (data not shown). One  
685 mL (containing  $\sim 6 \times 10^6$  CFU/mL) of the resulting liquid fraction was used to inoculate the sterile  
686 crushed meteorite samples *P. simplicissimum* and Consortium in sterile 6-well plates, and these  
687 were air-dried overnight at ~20–25 °C with a sterile procedure within a laminar flow-hood.

688 Non-biological controls were sterile crushed meteorite samples without cell inoculation.

689 After preparation, all samples were stored at room temperature (~20-25 °C) until integration in the  
690 BioMining Reactors (BMRs).

### 691 **4.4 Flight experimental setup**

692 Flow diagram summarising the BioAsteroid experiment setup is available in Figure 1C. Sample,  
693 medium and fixative integration into each Experiment Unit (EU)<sup>70</sup> (KEU-RK, from Kayser Italia,  
694 <http://www.bioreactorexpress.com/>) was performed under aseptic conditions before the launch.  
695 Each EU was composed of two BioMining Reactors (BMRs), which are culture chambers of 15 x

696 14 x 23.2 mm, that can contain 6 mL of liquid volume after hardware activation and medium  
697 injection. After integration, the culture chamber is delimited by the meteorite fragments, allocated  
698 on an aluminium grid to avoid dispersion of the rock pieces in the culture chamber, on one side,  
699 and a semipermeable silicone rubber membrane, to allow gas diffusion, on the remaining five  
700 sides. A small sterile piece of cotton ball was inserted between each rock sample and the EU back  
701 cover, to protect the rock pieces from excessive shaking during the rocket launch and space  
702 operations. Each BMR is connected to a 5 mL medium reservoir and a 1 mL fixative reservoir that  
703 were activated at the appropriate time. Each EU was integrated in an Experiment Container (EC,  
704 KIC-SLA-E3W, Kayser Italia) featuring semipermeable membrane for gas exchange and a  
705 transparent window that allows the direct observation of the experiment. ECs were equipped with  
706 temperature loggers (installed in one EUs; Signatrol SL52T sensors, Signatrol, UK) and  
707 accelerometers (in all EUs on ISS). A complete description of the EU can be found in <sup>70</sup>. A total  
708 of 12 samples in 6 EUs for the flight experiment and 18 samples in 9 EUs for the Earth samples  
709 were prepared on different timelines. After integration of the 6 flight EUs, occurred between  
710 September 29<sup>th</sup> and October 2<sup>nd</sup>, 2020, they were shipped to NASA Kennedy Space Centre  
711 (Florida, USA), while being stored at room temperature, and launched to the International Space  
712 Station (ISS) on a SpaceX Falcon-9 rocket (Commercial, Resupply Mission 21 mission) on  
713 December 6<sup>th</sup>, 2020. On arrival to the ISS, the samples were stored at room temperature (23.0 °C,  
714 temperature loggers) until installation into the microgravity (non-centrifuged) slots within the two  
715 KUBIK (ESA) incubators (5 and 6, Figure 1B) aboard the ISS, previously set to 20 °C, on  
716 December 20<sup>th</sup>, 2020, when the automatic timeline of the EUs was activated and medium (5 mL)  
717 was injected in consecutive manner to each culture chamber. All crew activities were performed  
718 by NASA astronaut Michael S. Hopkins. Samples grew for 19 days at 19.5 °C (temperature

719 loggers). At the end of the experiment, 1 mL of fixative was automatically injected into the culture  
720 chambers on January 8<sup>th</sup>, 2021) and hardware were cold stored at 1.5-11.5 °C (logged data). On  
721 orbit, the EUs were stored in the MELFI hardware, and were downloaded to Earth in cold storage  
722 bags (NASA-supplied passive temperature controlled facilities), in the SpaceX CRS-21 Dragon  
723 capsule (the same vehicle as for upload). Samples were shipped in cold storage to the University  
724 of Edinburgh (UK), where samples were retrieved after 12 days from the fixative injection.

725 Of the 9 EUs containing 18 Earth samples, 2 EUs, containing 4 non-biological controls, were  
726 prepared on March 16<sup>th</sup>, 2021, while the remaining 14 EUs were integrated on April 19<sup>th</sup>, 2021.

727 All the Earth samples were subject to analogous procedures and conditions to those occurring in  
728 the flight hardware, with incubation at 20 °C in a laboratory incubator (Mettler). Medium and  
729 fixative were injected by manual manipulation of the appropriate screws. Fixative injection  
730 occurred after 19 days from the medium injection, similarly to the flight experiment. After fixative  
731 injection, EUs were stored at 8 °C for 12 (samples prepared in March) or 14 (samples prepared in  
732 April) days, until sample retrieval. The difference in storage timing was due to technical reasons  
733 and did not affect the results (data not shown).

#### 734 **4.5 Post-flight sample recovery**

735 Samples were recovered separating the culture liquids, the meteorite fragments, the metal grids  
736 and the membranes.

737 Liquid cultures were treated differently depending on the species. While non-biological controls  
738 and *S. desiccabilis* samples did not require pre-treatments, liquid samples containing the fungus  
739 were homogenised by sonication (Microson ultrasonic cell disruptor, Misonix) with continuous  
740 pulse at setting 3 for 60 sec and then filtered through a sterile commercial cotton ball, to dissolve  
741 the mycelium and obtain a homogeneous solution. An aliquot of 1 mL was recovered from each

742 liquid sample and immediately stored at -80C for the metabolomics analysis, 0.5 mL were  
743 collected for pH measurement, 0.2 mL were collected for CFU and optical density analysis. 0.25  
744 mL were collected for flow cytometry analysis and treated as described below, the remaining  
745 aliquot of the liquid cultures were treated for ICP-MS analysis as described in the dedicated  
746 section.

747 An aliquot of the rock fragments was recovered, washed once with sterile water and air-dried at  
748 ~20-25 °C in a laminar flow hood under sterile conditions. These samples were analysed by XRD  
749 (data not shown) and Raman. Other representative aliquots of rock fragment were stored in 4%  
750 (v/v) formaldehyde at 4°C to preserve biofilms and mycelia. Remaining rock fragments were  
751 treated for scanning electron microscopy analysis as described below. This latter process was also  
752 performed for the membranes, metal grid and cotton samples.

#### 753 **4.6 Final cell concentration**

754 Final cell concentration was measured from the liquid fraction of the samples using three distinct  
755 methods: (i) measurement of the turbidity of the culture by spectrophotometric analysis; (ii) flow  
756 cytometry; (iii) counts of colony forming unit (CFU).

757 (i) Optical density (OD) was measured at wavelengths ( $\lambda$ ) of 600nm and 530nm from 100  $\mu$ L of  
758 the liquid fraction of each sample. Traditional OD<sub>600</sub> was used to measure final cell concentration.  
759 However, due to the iron bioleaching from the L-chondrite, the liquid fraction had a strong  
760 orange/red coloration for some samples, which influenced the measurement. For this reason, and  
761 for the presence of the fungus<sup>47</sup>, non-standard OD<sub>530</sub> was also measured (S2).

762 (ii) Flow cytometry was measured with a LSR Fortessa machine (BD Biosciences). Equipped with  
763 a 405nm laser, detecting the emissions of Calcofluor White Stain (fungi-specific dye, Sigma



764 Aldrich) binding through a 450/50nm band pass filter, and a 488nm laser with a 530/30nm filter  
765 to excite BacLight Green Bacterial Stain (bacteria-specific dye, Invitrogen), as were forward  
766 (FSC) and side (SSC) scattering. A volume of 250  $\mu$ L of the liquid fraction of each sample was  
767 washed once with a filter-sterile solution of Tween 80 at 0.1% (v/v) in PBS, then cells were fixed  
768 for 15 min at room temperature in a filter-sterile solution of 1% (v/v) formaldehyde in PBS.  
769 Finally, the liquid was removed and replaced after centrifugation for 5 minutes at max speed, with  
770 250  $\mu$ L of filter-sterile PBS. Samples were stored at 4°C until analysis. To have an estimation of  
771 final cell concentration, a volume of 100  $\mu$ L of the liquid fraction of the samples, appropriately  
772 diluted in the diluent (PBS filtered with a 0.22  $\mu$ m nylon filter), were acquired at a flow rate of 2-  
773 3  $\mu$ L/sec, and all events were counted. Samples were stained with BacLight Green at a final  
774 concentration of 0.1  $\mu$ M, Calcofluor White at a final concentration of 0.25  $\mu$ g/mL, both or none.  
775 When possible, each sample was measured twice per dye (i.e., 2 technical replicates). Appropriate  
776 gating was constructed using the software BD FACS Diva 8.0.1, to distinguish bacterial from fungal  
777 cells (gating strategy is reported in S16). Events in Bacteria and Fungi gates were counted and  
778 considered as single cells, to reconstruct final cell concentrations, expressed as cells/mL.

779 (iii) To measure colony forming units (CFU), serial dilutions of the liquid fraction were prepared,  
780 and 6-10 spots of 10  $\mu$ L (for a total volume of 60-100  $\mu$ L, respectively) of each dilution were  
781 spotted on R2A solid medium. These were incubated at room temperature for 2-5 days, until single  
782 colonies became visible. These were counted from the lowest dilution in which they were clearly  
783 distinguishable, and colonies of each spot, for each sample, were summed. Final CFU  
784 concentration (CFU/mL) was then calculated with the formula: [(total colonies) x dilution] / total  
785 volume].

786 The 3 methods described above were compared building a growth curve for each organism (*S.*  
787 *desiccabilis* or *P. simplicissimum*) for 19 days (the timeframe of this experiment), and measuring  
788 cell concentration at each datapoint with the 3 techniques (S17-18).

789 As CFU showed a potential bacterial contamination of some of the samples (three of three *P.*  
790 *simplicissimum* ISS samples, two of four *S. desiccabilis* Earth samples, four of four *P.*  
791 *simplicissimum* Earth samples, three of four Consortium Earth samples; S3), the genomic DNA of  
792 the affected samples, as well as that of the isolated contaminant species, was extracted with  
793 DNeasy PowerLyzer Microbial Kit (QIAGEN) to assess if the contamination was present in the  
794 original samples, or introduced later. The V3-V4 region of the 16S rDNA was amplified by PCR  
795 using the universal primers 341F/805R<sup>71</sup>, and the Q5 HighFidelity DNA polymerase (NEB). Prior  
796 to the addition of the DNA and the primers, the PCR master mix has been treated with 0.02% (v/v)  
797 of DNase I 1 U/mL (Zymo) at room temperature for 15 minutes, followed by DNase I  
798 deactivation at 75°C for 15 minutes, following the manufacturer instruction, to ensure complete  
799 decontamination of the master mix<sup>72</sup>. The PCR has been performed following the manufacturer  
800 instructions, using a  $T_m = 60^\circ\text{C}$  and 30 cycles. Amplicons have been checked on a 1.5% (w/v)  
801 agarose gel, and sent for Sanger sequencing with primers 341F and 805R to an external facility.  
802 The sequences obtained have been compared with sequences from the GenBank database using  
803 BLASTN (NCBI), and EZBioCloud (CJ Bioscience), for the bacterial identification.

#### 804 **4.7 Inductively Coupled Plasma Mass Spectrometry (ICP-MS)**

805 One millilitre of the liquid fraction of each sample was treated with nitric acid (final concentration  
806 4% v/v), and the samples were analysed by ICP-MS, to determine concentrations of the elements  
807 bioleached from the meteorite. ICP-MS analysis was also carried out on the medium (50% v/v  
808 R2A) and fixative (RNAlater).

809 All samples were analysed for a variety of elements using an Agilent 8900 ICP-MS instrument  
810 employing an RF (radio-frequency) forward power of 1550 W, RF matching of 1.8 V, with Argon  
811 gas flows of 1.02 L/min and 0.90 L/min for nebuliser and auxiliary flows, respectively. Sample  
812 solutions were taken up into a micro mist nebuliser by peristaltic pump at a rate of approximately  
813 1.2 mL/min. Skimmer and sample cones were made of nickel. The instrument was operated in  
814 spectrum multi-tune acquisition mode (three replicates runs per sample) for the three isotopes  
815 <sup>101</sup>Ruthenium, <sup>105</sup>Palladium and <sup>195</sup>Platinum using Helium mode with a flow rate of He 5  
816 mL/min. To calibrate the instrument, a multi-element calibration standard containing each element  
817 was prepared using 1000 mg /L single-element standards (SPE Science, Canada) diluted with 2%  
818 (v/v) HNO<sub>3</sub> (Aristar grade, VWR International, United Kingdom). The limits of detection for each  
819 element in He mode were 0.005, 0.005 and 0.007 µg/L for <sup>101</sup>Ruthenium, <sup>105</sup>Palladium and  
820 <sup>195</sup>Platinum respectively. Raw ICP-MS data (determined in µg/L) was converted to obtain the  
821 absolute quantity of a given element in the culture chamber, taking into account dilution factors  
822 applied during ICP-MS analysis.

823 To determine elemental concentrations in the L-chondrite material, between 25 and 50 mg of  
824 homogenised pristine sample (x3) was added to Savillex Teflon vessels. Rock standards (georem  
825 standards BCR2, BHVO1 and B-EN) were prepared in the same way. Two blanks were included  
826 (i.e., sample without L-chondrite). Three millilitres of double distilled HNO<sub>3</sub>, 2 mL HCl and  
827 0.5 mL HF was added to each of the vessels. HF was added after the other acids to prevent  
828 disassociation, formation and precipitation of aluminium fluorides. The HF addition is a necessary  
829 step in this protocol, however it compromises the detection of silicon from the rocks, due to its  
830 volatilisation. Samples were placed on a hot plate for digestion overnight (temperature of 100–  
831 120 °C) and checked for complete digestion. Samples were evaporated on the hot plate. Five

832 millilitres of 1 M HNO<sub>3</sub> was added to each vessel. Lids were added and the samples returned to  
833 the hot plate for a second digestion step. Samples were further diluted with 2–5% (v/v) HNO<sub>3</sub> for  
834 ICP-MS analysis. Analysis was carried out on a high resolution, sector field, ICP-MS (Nu AttoM).  
835 The ICP-MS measurements for elements were performed in low resolution (300), in Deflector  
836 jump mode with a dwell time of 1 ms and 3 cycles of 500 sweeps. Data were reported in  
837 micrograms of element per gram of chondrite.

#### 838 **4.8 Scanning Electron Microscopy and elemental mapping**

839 Representative samples of rock (~0.3 g) with or without microbial growth were stored in a solution  
840 of 3% (v/v) glutaraldehyde in 10 mM HEPES buffer, pH 7.0 for 5 days at 4° C. After this period,  
841 stepwise dehydration with graded series of 10, 30, 50, 70, 90, and 100% (v/v) ethanol was  
842 performed for 10 min each. Samples were stored at 4° C prior to drying with liquid carbon dioxide  
843 in a Polaron E3100 critical point dryer to preserve cell morphologies. Samples were then affixed  
844 to SEM Aluminium stubs (Agar Scientific) using a small quantity of conductive carbon glue (Agar  
845 Scientific) and coated with 20 nm of gold with a sputter coater (Denton Vacuum) to enhance  
846 conductivity for secondary electron imaging.

847 Further samples were mounted in epoxy resin and polished before carbon coating (Denton BTT-  
848 IV carbon evaporation coater) for backscatter electron (BSE) imaging and EDS element mapping.  
849 Samples were stored in plastic boxes to prevent dust contamination prior to imaging and analysis  
850 using a Carl Zeiss SIGMA HD VP field emission SEM with an Oxford Instruments AZtec EDS  
851 system at the School of GeoSciences, University of Edinburgh.

## 852 **4.9 Raman**

853 Raman spectra were recorded with a fibre optic Raman probe and 785 nm stabilized diode laser  
854 (Ocean Insight). The probe was mounted to a motorized X-Y-Z translation stage and scanned  
855 across the sample surface. Raman spectra were recorded at ca. 0.1 mm lateral resolution and the  
856 probe height was adjusted in Z at each point to maximize the Raman signal. The resulting maps  
857 were analysed by comparing the Raman peaks at each spectrum to mineral Raman spectra from  
858 the RRUFF database to assign a mineral intensity. The broad background fluorescence intensity  
859 is the sum of the entire spectrum from 200 – 2000  $\text{cm}^{-1}$ . The intensity of sharp luminescence  
860 peaks is found by summing the spectral region between 1200 – 1600  $\text{cm}^{-1}$ .

## 861 **4.10 Metabolomics analysis**

862 Polar and non-polar metabolites were analysed using liquid chromatography coupled to high  
863 resolution mass spectrometry. Polar metabolites were prepared by diluting the samples a ratio 1:5  
864 (sample/buffer) in extracting buffer (40% v/v MeOH, 40% v/v MeCN and 20% v/v H<sub>2</sub>O) prior to  
865 injection. Non-polar metabolites were enriched by bi-phasic extraction using ethyl-acetate.  
866 Metabolites were extracted by vortexing the tubes for 20 min with subsequent spinning down. The  
867 organic layer was evaporated and reconstituted in 50% (v/v) MeOH- 50% H<sub>2</sub>O (v/v) prior to  
868 injection.

869 During metabolite analysis, a pHILIC column (Merck, Germany) was used to separate polar  
870 metabolites, and a Luna C18 (Phenomenex, United States) to separate non-polar metabolites. An  
871 Ultimate 3000 HPLC (Thermo Fisher Scientific, Germany) coupled to a Q-Exactive mass  
872 spectrometer (Thermo-Fisher Scientific, Germany) operated in polarity switch mode was used.  
873 Pooled samples, chemical standards and procedure blanks were also analysed. Detailed description  
874 of the methods are included in literature <sup>73-75</sup>.

875 Peak detection and integration from Raw data were performed using Compound Discoverer 3.2  
876 (Thermo-Fisher Scientific). An automatic filter set was applied initially to remove features of low  
877 quality. Features marked as background signals were removed, with a retention time below one  
878 minute, or whose annotated mass diverged by  $>5\text{ppm}$  from measured mass, were removed.  
879 Features with at least two partial matches on reference databases [mzCloud (HighChem LLC),  
880 mzVault (Thermo-Fischer Scientific), ChemSpider (Royal Society of Chemistry), and a list of  
881 known standards] and full fragmentation data were considered appropriate for further analysis.  
882 Partial matches were not discounted as inconsistencies in database entries may affect the match  
883 strength without invalidating the annotation. If a feature passed filtering solely based on partial  
884 matches, its predicted structure was manually confirmed to be identical to that of the database  
885 entry, to ensure correct annotation. Finally, features of insufficient total signal area were removed.  
886 Once filtered, all features significantly associated with a condition of interest were identified via  
887 differential analysis, with significance determined by  $p \leq 0.05$ . These conditions were: up- or down-  
888 regulated in fungal, bacterial, or Consortium culture. Once these lists of hits were produced, the  
889 chromatogram of each feature on each list was manually assessed for peak quality. Peaks with a  
890 maximum intensity  $<4 \times 10^6$  counts were removed to ensure sufficient separation from background  
891 signals. Features were then assessed individually in greater detail via the metrics produced by  
892 Compound Discoverer 3.2. Metrics assayed were both quantitative and qualitative, and consisted  
893 of peak areas, group coefficient of variance, adjusted p-values of experimental/control ratios, and  
894 the number and identity of positively identified signals per feature. Data analysis and figures were  
895 produced using the open source MetaboAnalyst 5.0 program <sup>76</sup>.

896

897

#### 898 **4.11 X-Ray Diffraction (XRD)**

899 Pooled samples were analysed using X-ray Diffraction at the School of Geosciences, University  
900 of Edinburgh. Fragments of the L-chondrite were gently crushed in a mortar and pestle into a  
901 powder. The powder (~1 g each) was mounted on clean plastic slides. Care was taken to use as  
902 little compressional force as possible to minimise preferred mineral grain orientation. The samples  
903 were fed into a Bruker D8-Advance X-ray Diffractometer, using a 2-theta configuration in which  
904 the X-rays were generated by a Cu-anode X-ray tube operating at 40 kV and a tube current of 40  
905 mA. Diffracted X-rays were detected using a sodium iodide scintillation detector. The samples  
906 were scanned from 2 to 60 degrees two theta with a scan rate of 0.02° per second. Resultant  
907 diffractograms were compared to the International Centre for Diffraction Data (ICDD)  
908 diffractogram database library (2012 issue) using the EVA analysis package. Typically, this  
909 procedure gives a detection limit for crystalline phases of approximately 1 wt.%. To quantify  
910 mineral abundances in the samples, the diffractograms were subject to Rietveld analysis using the  
911 TOPAS software package. This involved identifying the mineral assemblage present by comparing  
912 peak positions and heights with those in the powder diffraction database. The TOPAS program  
913 then generated a ‘model’ diffraction pattern, calculated from an initial estimated mineral  
914 assemblage. The differences between the two are reduced iteratively, which typically takes around  
915 100 iterations, until the model and observed patterns converge, revealing the amounts of the  
916 minerals in wt.%.

#### 917 **4.12 Data analysis and figure production**

918 Statistical analysis was performed using RStudio 2023.03.0 Build 386 and Microsoft Excel for  
919 Microsoft 365 MSO (Version 2303 Build 16.0.16227.20202) 64-bit. Figures were produced using  
920 RStudio 2023.03.0 Build 386 and Inkscape 1.1.

921 **5. Contribution**

922 RS and CSC conceived and designed the experiment, produced and analysed the experimental  
923 data. RS performed and coordinated pre- and post-flight experiments and data analysis, space  
924 experiment preparation and wrote the manuscript. RS performed the cell concentration (with  
925 partial support of ACW), SEM and elemental mapping analysis. AS produced the RStudio code  
926 for the ICP-MS data analysis, supported RS with the sequencing and identification of the  
927 contaminants, with the statistical analysis, and with the final draft's correction. GRB, AG and RS  
928 performed the metabolomics analysis. LJE performed the ICP-MS and ICP-OES analysis of the  
929 liquid fractions, LP those of the meteorite, GS performed XRD, JH and KRB performed the Raman  
930 analysis. NC supported the work with SEM, while MW supported the flow cytometry experiments.  
931 RS and CSC performed the pre- and post-flight hardware activities, with the support of SML. MB  
932 was the KI scientific referent, AM was the KI project manager and GN was the Bioreactor Express  
933 program manager MB, AM and GN prepared and managed the space and Earth bioreactors and  
934 containers. All authors approved the manuscript for publication.

935 **6. Acknowledgements and funding**

936 RS and CSC were supported by United Kingdom Science and Technology Facilities Council under  
937 grant ST/V000586/1. RS was partially supported by Leverhulme Trust under grant ECF-2021-185.  
938 Edinburgh-Rice Strategic Collaboration Awards supported JH, CSC, RS and KRB with the Raman  
939 analysis. We thank SkyFall Meteorites for the L-chondrite sample. We are thankful to Stefano  
940 Pellari, Ramon Nartallo, David Zolesi and Alessandro Donati (Kayser Italia Srl, and Kayser Space  
941 Ltd) for their support, to Robert Bunker (Meritics Ltd) for the meteorite surface area analysis, and  
942 to Stephen Mitchell (University of Edinburgh) for the support on CPD procedures. Flow cytometry  
943 data were generated within the Flow Cytometry and Cell Sorting Facility in Ashworth, King's



944 Buildings (University of Edinburgh), supported by funding from Wellcome and the University of  
945 Edinburgh. We thank NASA astronaut Michael Scott Hopkins for taking care of BioAsteroid  
946 onboard the ISS, Nic Odling (University of Edinburgh) for the support with the XRD, Rebecca D.  
947 Prescott (University of Mississippi, University of Hawai'i at Mānoa, NASA JSC) for helping with  
948 the fixative choice, Virginia Echavarri-Bravo (University of Edinburgh) for useful discussions on  
949 flow cytometry, Diana, Sean (and Violet) Marosi-McMahon for their support on the statistical  
950 analysis.

## 951 **7. Competing interests**

952 AM, MB and GN are employees of Kayser Italia L.t.d. All other authors declare no competing  
953 interests.

## 954 **8. References**

- 955
- 956 1. Verseux, C. *et al.* Sustainable life support on Mars - The potential roles of cyanobacteria.  
957 *Int. J. Astrobiol.* **15**, 65–92 (2016).
  - 958 2. Gumulya, Y., Zea, L. & Kaksonen, A. H. *In situ* resource utilisation: The potential for  
959 space biomining. *Miner. Eng.* **176**, 107288 (2022).
  - 960 3. Aversch, N. J. H. Choice of Microbial System for *In-Situ* Resource Utilization on Mars.  
961 *Front. Astron. Sp. Sci.* **8**, 1–7 (2021).
  - 962 4. Santomartino, R. *et al.* Toward sustainable space exploration: a roadmap for harnessing  
963 the power of microorganisms. *Nat. Commun.* **14**, 1–11 (2023).
  - 964 5. Cockell, C. S. Geomicrobiology beyond Earth: Microbe-mineral interactions in space  
965 exploration and settlement. *Trends Microbiol.* **18**, 308–314 (2010).
  - 966 6. Santomartino, R., Zea, L. & Cockell, C. S. The smallest space miners: principles of space  
967 biomining. *Extremophiles* **26**, 1–19 (2022).
  - 968 7. Housen, K. R., Wilkening, L. L., Chapman, C. R. & Greenberg, R. Asteroidal regoliths.  
969 *Icarus* **39**, 317–351 (1979).
  - 970 8. Rubin, A. E. Mineralogy of meteorite groups. *Meteorit. Planet. Sci.* **32**, 231–247 (1997).
  - 971 9. Ross, S. D. Near-Earth Asteroid Mining. in *Space Industry Report* 1–24 (2001).
  - 972 10. Klas, M. *et al.* Biomining and methanogenesis for resource extraction from asteroids.

- 973 *Space Policy* **34**, 18–22 (2015).
- 974 11. Steenstra, E. S. *et al.* An experimental assessment of the potential of sulfide saturation of  
975 the source regions of eucrites and angrites: Implications for asteroidal models of core  
976 formation, late accretion and volatile element depletions. *Geochim. Cosmochim. Acta* **269**,  
977 39–62 (2020).
- 978 12. Kettler, P. B. Platinum group metals in catalysis: Fabrication of catalysts and catalyst  
979 precursors. *Org. Process Res. Dev.* **7**, 342–354 (2003).
- 980 13. Hein, A. M., Matheson, R. & Fries, D. A techno-economic analysis of asteroid mining.  
981 *Acta Astronaut.* **168**, 104–115 (2020).
- 982 14. Gertsch, R. E. Asteroid mining. in *Space resources: materials* 111–120 (1992).
- 983 15. Cockell, C. S. Synthetic geomicrobiology: Engineering microbe-mineral interactions for  
984 space exploration and settlement. *Int. J. Astrobiol.* **10**, 315–324 (2011).
- 985 16. Aversch, N. J. H. *et al.* Microbial biomanufacturing for space-exploration—what to take  
986 and when to make. *Nat. Commun.* **14**, 1–10 (2023).
- 987 17. Nangle, S. N. *et al.* The case for biotech on Mars. *Nat. Biotechnol.* **38**, 401–407 (2020).
- 988 18. Berliner, A. J. *et al.* Space bioprocess engineering on the horizon. *Commun. Eng.* **1**, 13  
989 (2022).
- 990 19. Schippers, A. *et al.* Biomining: Metal Recovery from Ores with Microorganisms.  
991 *Geobiotechnology I. Adv. Biochem. Eng.* **141**, 1–47 (2013).
- 992 20. Roberto, F. F. & Schippers, A. Progress in bioleaching: part B, applications of microbial  
993 processes by the minerals industries. *Appl. Microbiol. Biotechnol.* **106**, 5913–5928 (2022).
- 994 21. Johnson, D. B., Grail, B. M. & Hallberg, K. B. A new direction for biomining: Extraction  
995 of metals by reductive dissolution of oxidized ores. *Minerals* **3**, 49–58 (2013).
- 996 22. Brune, K. D. & Bayer, T. S. Engineering microbial consortia to enhance biomining and  
997 bioremediation. *Front. Microbiol.* **3**, 1–6 (2012).
- 998 23. Brandl, H., Bosshard, R. & Wegmann, M. Computer-munching microbes: Metal leaching  
999 from electronic scrap by bacteria and fungi. *Process Metall.* **9**, 569–576 (1999).
- 1000 24. Rohwerder, T., Gehrke, T., Kinzler, K. & Sand, W. Bioleaching review part A: Progress  
1001 in bioleaching: Fundamentals and mechanisms of bacterial metal sulfide oxidation. *Appl.*  
1002 *Microbiol. Biotechnol.* **63**, 239–248 (2003).
- 1003 25. Noël, N., Florian, B. & Sand, W. AFM & EFM study on attachment of acidophilic  
1004 leaching organisms. *Hydrometallurgy* **104**, 370–375 (2010).
- 1005 26. Adeleke, R., Cloete, E. & Khasa, D. Isolation and identification of iron ore-solubilising  
1006 fungus. *S. Afr. J. Sci.* **106**, 1–6 (2010).
- 1007 27. Din, G. *et al.* Characterization of Organic Acid Producing *Aspergillus tubingensis* FMS1  
1008 and its Role in Metals Leaching from Soil. *Geomicrobiol. J.* **37**, 336–344 (2020).
- 1009 28. Barnett, M. J., Palumbo-Roe, B. & Gregory, S. P. Comparison of heterotrophic

- 1010 bioleaching and ammonium sulfate ion exchange leaching of rare earth elements from a  
1011 Madagascan ion-adsorption clay. *Minerals* **8**, 1–11 (2018).
- 1012 29. Gadd, G. M. *Fungal production of citric and oxalic acid: Importance in metal speciation,*  
1013 *physiology and biogeochemical processes. Advances in Microbial Physiology* vol. 41  
1014 (Elsevier Masson SAS, 1999).
- 1015 30. Cockell, C. S. & Santomartino, R. Mining and Microbiology for the Solar System Silicate  
1016 and Basalt Economy. in *In Space Manufacturing Resources: Earth and Planetary*  
1017 *Exploration Applications* (eds. Hessel, V., Stoudemire, J., Miyamoto, H. & Fisk, I. D.)  
1018 163–185 (Wiley, 2022). doi:<https://doi.org/10.1002/9783527830909.ch8>.
- 1019 31. Cockell, C. S. *et al.* Microbially-Enhanced Vanadium Mining and Bioremediation Under  
1020 Micro- and Mars Gravity on the International Space Station. *Front. Microbiol.* **12**, 663  
1021 (2021).
- 1022 32. Cockell, C. S. *et al.* Space station biomining experiment demonstrates rare earth element  
1023 extraction in microgravity and Mars gravity. *Nat. Commun.* **11**, 1–12 (2020).
- 1024 33. Byloos, B. *et al.* The impact of space flight on survival and interaction of *Cupriavidus*  
1025 *metallidurans* CH34 with basalt, a volcanic moon analog rock. *Front. Microbiol.* **8**, 1–14  
1026 (2017).
- 1027 34. Castelein, S. M. *et al.* Iron can be microbially extracted from Lunar and Martian regolith  
1028 simulants and 3D printed into tough structural materials. *PLoS One* **16**, 1–21 (2021).
- 1029 35. Figueira, J. *et al.* Biomining of Lunar regolith simulant EAC-1A with the fungus  
1030 *Penicillium simplicissimum*. *Res. Sq.* (2023) doi:[https://doi.org/10.21203/rs.3.rs-](https://doi.org/10.21203/rs.3.rs-2909117/v1)  
1031 [2909117/v1](https://doi.org/10.21203/rs.3.rs-2909117/v1).
- 1032 36. Waajen, A. C., Prescott, R. & Cockell, C. S. Meteorites as Food Source on Early Earth:  
1033 Growth, Selection, and Inhibition of a Microbial Community on a Carbonaceous  
1034 Chondrite. *Astrobiology* **22**, (2022).
- 1035 37. Milojevic, T. *et al.* Exploring the microbial biotransformation of extraterrestrial material  
1036 on nanometer scale. *Sci. Rep.* **9**, 1–11 (2019).
- 1037 38. Milojevic, T. *et al.* Chemolithotrophy on the Noachian Martian breccia NWA 7034 via  
1038 experimental microbial biotransformation. *Commun. Earth Environ.* **2**, (2021).
- 1039 39. Reddy, G. S. N. & Garcia-Pichel, F. *Sphingomonas mucosissima* sp. nov. and  
1040 *Sphingomonas desiccabilis* sp. nov., from biological soil crusts in the Colorado Plateau,  
1041 USA. *Int. J. Syst. Evol. Microbiol.* **57**, 1028–1034 (2007).
- 1042 40. Asaf, S. *et al.*, *Sphingomonas*: from diversity and genomics to functional role in  
1043 environmental remediation and plant growth. *Critical Reviews in Biotechnology*, **40**:2,  
1044 138-152, (2020).
- 1045 41. Ambreen, N., Bhatti, H. N. & Bhatti, T. M. Bioleaching of Bauxite by *Penicillium*  
1046 *simplicissimum*. *J. Biol. Sci.* **2**, 793–796 (2002).
- 1047 42. Franz, A., Burgstaller, W. & Schinner, F. Leaching with *Penicillium simplicissimum*:  
1048 Influence of metals and buffers on proton extrusion and citric acid production. *Appl.*

- 1049 *Environ. Microbiol.* **57**, 769–774 (1991).
- 1050 43. Amiri, F., Yaghmaei, S. & Mousavi, S. M. Bioleaching of tungsten-rich spent  
1051 hydrocracking catalyst using *Penicillium simplicissimum*. *Bioresour. Technol.* **102**, 1567–  
1052 1573 (2011).
- 1053 44. Rawlings, D. E. & Johnson, D. B. The microbiology of biomining: Development and  
1054 optimization of mineral-oxidizing microbial consortia. *Microbiology* **153**, 315–324  
1055 (2007).
- 1056 45. McCoy-West, A. J., Millet, M. A. & Burton, K. W. The neodymium stable isotope  
1057 composition of the silicate Earth and chondrites. *Earth Planet. Sci. Lett.* **480**, 121–132  
1058 (2017).
- 1059 46. Gaft, M., Reisfeld, R. & Panczer, G. *Modern Luminescence Spectroscopy of Minerals and*  
1060 *Materials*. (Springer Mineralogy, 2015). doi:10.1007/978-3-319-24765-6.
- 1061 47. Petrikkou, E. *et al.* Inoculum standardization for antifungal susceptibility testing of  
1062 filamentous fungi pathogenic for humans. *J. Clin. Microbiol.* **39**, 1345–1347 (2001).
- 1063 48. Bellenberg, S. *et al.* Biofilm formation, communication and interactions of leaching  
1064 bacteria during colonization of pyrite and sulfur surfaces. *Res. Microbiol.* **165**, 773–781  
1065 (2014).
- 1066 49. Zuo, R., Kus, E., Mansfeld, F. & Wood, T. K. The importance of live biofilms in  
1067 corrosion protection. *Corros. Sci.* **47**, 279–287 (2005).
- 1068 50. Jayaraman, A., Sun, A. K. & Wood, T. K. Characterization of axenic *Pseudomonas fragi*  
1069 and *Escherichia coli* biofilms that inhibit corrosion of SAE 1018 steel. *J. Appl. Microbiol.*  
1070 **84**, 485–492 (1998).
- 1071 51. Zuo, R. Biofilms: Strategies for metal corrosion inhibition employing microorganisms.  
1072 *Appl. Microbiol. Biotechnol.* **76**, 1245–1253 (2007).
- 1073 52. Stevens, A. H. *et al.* Growth, Viability, and Death of Planktonic and Biofilm  
1074 *Sphingomonas desiccabilis* in Simulated Martian Brines. *Astrobiology* **19**, 87–98 (2019).
- 1075 53. Reed, D. W., Fujita, Y., Daubaras, D. L., Jiao, Y. & Thompson, V. S. Bioleaching of rare  
1076 earth elements from waste phosphors and cracking catalysts. *Hydrometallurgy* **166**, 34–40  
1077 (2016).
- 1078 54. Vailati, A. *et al.* Diffusion in liquid mixtures. *npj Microgravity* **9**, 1–8 (2023).
- 1079 55. Huang, B., Li, D. G., Huang, Y. & Liu, C. T. Effects of spaceflight and simulated  
1080 microgravity on microbial growth and secondary metabolism. *Mil. Med. Res.* **5**, 1–14  
1081 (2018).
- 1082 56. De Gelder, J. *et al.* Raman spectroscopic analysis of *Cupriavidus metallidurans* LMG  
1083 1195 (CH34) cultured in low-shear microgravity conditions. *Microgravity Sci. Technol.*  
1084 **21**, 217–223 (2009).
- 1085 57. Saleh, D. K., Abdollahi, H., Noaparast, M., Nosratabad, A. F. & Tuovinen, O. H.  
1086 Dissolution of Al from metakaolin with carboxylic acids produced by *Aspergillus niger*,  
1087 *Penicillium bilaji*, *Pseudomonas putida*, and *Pseudomonas koreensis*. *Hydrometallurgy*

- 1088           **186**, 235–243 (2019).
- 1089   58.   Panhwar, Q. A., Naher, U. A., Shamshuddin, J., Othman, R. & Latif, M. A. Biochemical  
1090   and molecular characterization of potential phosphate-solubilizing bacteria in acid sulfate  
1091   soils and their beneficial effects on rice growth. *PLoS One* **9**, (2014).
- 1092   59.   Shang, R. Palladium-Catalyzed Decarboxylative Coupling of Potassium Oxalate  
1093   Monoester with Aryl and Alkenyl Halides. in *New Carbon–Carbon Coupling Reactions*  
1094   *Based on Decarboxylation and Iron-Catalyzed C–H Activation* 49–61 (Springer Nature  
1095   Singapore Pte Ltd., 2017). doi:10.1007/978-981-10-3193-9\_2.
- 1096   60.   Li, X. & Binnemans, K. Oxidative Dissolution of Metals in Organic Solvents. *Chem. Rev.*  
1097   **121**, 4506–4530 (2021).
- 1098   61.   Li, C. *et al.* Assessment of 2,2,6,6-tetramethyl-4-piperidinol-based amine N-halamine-  
1099   labeled silica nanoparticles as potent antibiotics for deactivating bacteria. *Colloids*  
1100   *Surfaces B Biointerfaces* **126**, 106–114 (2015).
- 1101   62.   Furumura, S. *et al.* Identification and Functional Characterization of Fungal Chalcone  
1102   Synthase and Chalcone Isomerase. *J. Nat. Prod.* **86**, 398–405 (2023).
- 1103   63.   Oenbrink, G. & Schiffer, T. Cyclododecanol, Cyclododecanone, and Laurolactam.  
1104   *Ullmann’s Encycl. Ind. Chem.* 1–5 (2009) doi:10.1002/14356007.a08\_201.pub2.
- 1105   64.   Santomartino, R. *et al.* No Effect of Microgravity and Simulated Mars Gravity on Final  
1106   Bacterial Cell Concentrations on the International Space Station : Applications to Space  
1107   Bioproduction. *Front. Microbiol.* **11**, 1–15 (2020).
- 1108   65.   Volger, R. *et al.* Mining moon & mars with microbes: Biological approaches to extract  
1109   iron from Lunar and Martian regolith. *Planet. Space Sci.* **184**, 104850 (2020).
- 1110   66.   Prescott, R. D. *et al.* Including Descriptions of Three Novel Bacterial Species Isolated  
1111   from Mars Analog Sites of Cultural Relevance. *Astrobiology* **23**, 1–20 (2023).
- 1112   67.   Rasoulnia, P., Mousavi, S. M., Rastegar, S. O. & Azargoshasb, H. Fungal leaching of  
1113   valuable metals from a power plant residual ash using *Penicillium simplicissimum*:  
1114   Evaluation of thermal pretreatment and different bioleaching methods. *Waste Manag.* **52**,  
1115   309–317 (2016).
- 1116   68.   Welten, K. *et al.* The L3-6 chondritic regolith breccia Northwest Africa (NWA) 869: (II)  
1117   Noble gases and cosmogenic radionuclides. *Meteorit. Planet. Sci.* **46**, 970–988 (2011).
- 1118   69.   Metzler, K. *et al.* The L3-6 chondritic regolith breccia Northwest Africa (NWA) 869: (I)  
1119   Petrology, chemistry, oxygen isotopes, and Ar-Ar age determinations. *Meteorit. Planet.*  
1120   *Sci.* **46**, 652–680 (2011).
- 1121   70.   Loudon, C. M. *et al.* BioRock: new experiments and hardware to investigate microbe–  
1122   mineral interactions in space. *Int. J. Astrobiol.* **17**, 303–313 (2018).
- 1123   71.   Herlemann, D. P. R. *et al.* Transitions in bacterial communities along the 2000 km salinity  
1124   gradient of the Baltic Sea. *ISME J.* **5**, 1571–1579 (2011).
- 1125   72.   Heininger, A. *et al.* DNase pretreatment of master mix reagents improves the validity of  
1126   universal 16S rRNA gene PCR results. *J. Clin. Microbiol.* **41**, 1763–1765 (2003).

- 1127 73. Chetwynd, A. J., Dunn, W. B. & Rodriguez-Blanco, G. Metabolomics: From  
1128 Fundamentals to Clinical Applications. in *Metabolomics: From Fundamentals to Clinical*  
1129 *Applications, Advances in Experimental Medicine and Biology* (ed. Sussulini, A.) vol. 965  
1130 19–44 (Springer International Publishing AG 2017, 2017).
- 1131 74. MacKay, G. M., Zheng, L., Van Den Broek, N. J. F. & Gottlieb, E. Analysis of Cell  
1132 Metabolism Using LC-MS and Isotope Tracers. in *Methods in Enzymology* vol. 561 171–  
1133 196 (Elsevier Inc., 2015).
- 1134 75. Sarafian, M. H. *et al.* Objective set of criteria for optimization of sample preparation  
1135 procedures for ultra-high throughput untargeted blood plasma lipid profiling by ultra  
1136 performance liquid chromatography-mass spectrometry. *Anal. Chem.* **86**, 5766–5774  
1137 (2014).
- 1138 76. Pang, Z. *et al.* MetaboAnalyst 5.0: Narrowing the gap between raw spectra and functional  
1139 insights. *Nucleic Acids Res.* **49**, W388–W396 (2021).
- 1140
